# Supplementary material for: Text-based over-representation analysis of microarray gene lists with annotation bias
Source: PubMed Central journal article supplement — Nucleic Acids Res. 2009 May 8;37(11):e79. doi: 10.1093/nar/gkp310 (PMC2699530; doi:10.1093/nar/gkp310), 2009-05-08

## Supplementary Data 1

### **Table S1. Over-represented abstract terms in the ISG gene list identified using different approaches**

This is a four part table showing the results from four different methods: (a) Classical hypergeometric, (b) Permutation test, (c) *Outlier*, and (d) *ExtendedHG*. Over-represented terms were selected by using Bonferroni correction  $p$ -value  $\leq 0.05$  as threshold.

### **Figure S1. Relationship between annotation level and consensus gene age**

This is a boxplot showing the number of PMID associated with genes represented on the HG-U133A chip when stratified by the consensus gene age.

### **Figure S2. Concordance between *Outlier* and *ExtendedHG***

This is a concordance plot showing the rankings for the top 100 most significant tokens found by *Outlier* and *ExtendedHG* when applied to the ISG gene list.

### **Figure S3. Histograms of hits across different species in *Outlier***

Histogram of the number of tokens identified as over-represented by the *Outlier* method in gene lists derived from experiments performed on 10 Affymetrix platforms.  $n$  = number of gene lists available for each platform.

### **Figure S4. Histograms of hits across different species in *ExtendedHG***

Histogram of the number of tokens identified as over-represented by the *ExtendedHG* method in gene lists derived from experiments performed on 10 Affymetrix platforms.  $n$  = number of gene lists available for each platform.

### **Figure S5. Outlier detection diagnostic plots**

This is a 4-panel plot showing the effect of smoothing the local Chip means and SD as a function of the List frequencies using polynomial fitting.

**Table S1. Over-represented abstract terms in the ISG gene list identified using different approaches**

**(a) Classical hypergeometric**

| Term                 | Chip | List | p-value  | Bonferroni p-value | Rank |
|----------------------|------|------|----------|--------------------|------|
| INTERFERON           | 414  | 46   | 1.67E-48 | 1.96E-44           | 1    |
| IFN                  | 245  | 35   | 2.90E-39 | 3.40E-35           | 2    |
| ANTIVIRAL            | 176  | 23   | 5.39E-24 | 6.33E-20           | 3    |
| IFN-BETA             | 71   | 18   | 9.52E-24 | 1.12E-19           | 4    |
| IFN-ALPHA            | 114  | 19   | 1.38E-21 | 1.62E-17           | 5    |
| INDUCIBLE            | 1068 | 37   | 7.02E-20 | 8.24E-16           | 6    |
| INTERFERON-ALPHA     | 59   | 14   | 8.13E-18 | 9.53E-14           | 7    |
| INFECTION            | 1177 | 36   | 1.60E-17 | 1.87E-13           | 8    |
| VIRAL                | 892  | 32   | 3.09E-17 | 3.62E-13           | 9    |
| IMMUNE               | 1275 | 35   | 1.58E-15 | 1.85E-11           | 10   |
| TREAT                | 1817 | 40   | 6.32E-15 | 7.41E-11           | 11   |
| INNATE               | 363  | 21   | 9.16E-15 | 1.07E-10           | 12   |
| IFN-GAMMA            | 443  | 22   | 3.43E-14 | 4.02E-10           | 13   |
| VIRUS                | 1408 | 34   | 2.07E-13 | 2.42E-09           | 14   |
| IMMUNITY             | 387  | 20   | 3.78E-13 | 4.43E-09           | 15   |
| DSRNA                | 60   | 11   | 1.25E-12 | 1.46E-08           | 16   |
| INDUCTION            | 2048 | 39   | 1.92E-12 | 2.26E-08           | 17   |
| OLIGOADENYLATE       | 18   | 8    | 4.64E-12 | 5.44E-08           | 18   |
| LYMPHOBLASTOID       | 239  | 16   | 4.80E-12 | 5.63E-08           | 19   |
| ISRE                 | 31   | 9    | 5.67E-12 | 6.65E-08           | 20   |
| HOST                 | 800  | 24   | 5.44E-11 | 6.38E-07           | 21   |
| ISG                  | 14   | 7    | 8.39E-11 | 9.84E-07           | 22   |
| MHC                  | 353  | 17   | 1.16E-10 | 1.37E-06           | 23   |
| TREATMENT            | 3120 | 45   | 1.42E-10 | 1.66E-06           | 24   |
| HLA-A                | 30   | 8    | 2.81E-10 | 3.29E-06           | 25   |
| STOMATITIS           | 52   | 9    | 4.91E-10 | 5.76E-06           | 26   |
| BETA                 | 2127 | 36   | 7.56E-10 | 8.86E-06           | 27   |
| RESPONSE             | 3630 | 47   | 1.53E-09 | 1.79E-05           | 28   |
| HLA-CLASS            | 11   | 6    | 2.43E-09 | 2.85E-05           | 29   |
| EVASION              | 65   | 9    | 3.10E-09 | 3.64E-05           | 30   |
| CYTOKINE             | 1266 | 27   | 3.37E-09 | 3.95E-05           | 31   |
| ANTIGEN              | 1687 | 31   | 3.93E-09 | 4.60E-05           | 32   |
| INFECT               | 825  | 22   | 4.13E-09 | 4.84E-05           | 33   |
| INDUCE               | 4669 | 53   | 4.27E-09 | 5.01E-05           | 34   |
| HLA-B                | 25   | 7    | 4.71E-09 | 5.52E-05           | 35   |
| HISTOCOMPATIBILITY   | 303  | 14   | 1.51E-08 | 0.00018            | 36   |
| LINE                 | 4667 | 52   | 1.62E-08 | 0.00019            | 37   |
| HEPATITIS            | 366  | 15   | 1.71E-08 | 0.00020            | 38   |
| MELANOMA             | 581  | 18   | 2.22E-08 | 0.00026            | 39   |
| ENCEPHALOMYOCARDITIS | 16   | 6    | 2.25E-08 | 0.00026            | 40   |
| REPLICATION          | 830  | 21   | 2.66E-08 | 0.00031            | 41   |
| AFTER                | 3913 | 46   | 7.39E-08 | 0.00087            | 42   |
| MONOCLONAL           | 1365 | 26   | 7.45E-08 | 0.00087            | 43   |
| EPSTEIN-BARR         | 233  | 12   | 8.20E-08 | 0.00096            | 44   |
| UPREGULATE           | 1087 | 23   | 1.03E-07 | 0.00121            | 45   |
| SYNTHESIS            | 2200 | 33   | 1.28E-07 | 0.00150            | 46   |
| BETA2-MICROGLOBULIN  | 42   | 7    | 1.29E-07 | 0.00151            | 47   |
| EBV                  | 194  | 11   | 1.47E-07 | 0.00173            | 48   |
| GAMMA-INTERFERON     | 44   | 7    | 1.72E-07 | 0.00202            | 49   |

**Table S1. Over-represented abstract terms in the ISG gene list identified using different approaches (continued)**

**(a) Classical hypergeometric**

| Term             | Chip | List | $p$ -value | Bonferroni $p$ -value | Rank |
|------------------|------|------|------------|-----------------------|------|
| HLA              | 253  | 12   | 1.89E-07   | 0.00221               | 50   |
| INTERFERON-GAMMA | 313  | 13   | 1.95E-07   | 0.00229               | 51   |
| OAS              | 10   | 5    | 2.04E-07   | 0.00239               | 53   |
| HLA-G            | 10   | 5    | 2.04E-07   | 0.00239               | 52   |
| TYPE             | 4725 | 50   | 3.15E-07   | 0.00369               | 54   |
| MXA              | 11   | 5    | 3.19E-07   | 0.00374               | 55   |
| ALPHA            | 2422 | 34   | 3.50E-07   | 0.00411               | 56   |
| DEFINE           | 2823 | 37   | 3.81E-07   | 0.00447               | 57   |
| IMMUNODEFICIENCY | 472  | 15   | 3.95E-07   | 0.00464               | 58   |
| PROMYELOCYTIC    | 216  | 11   | 4.00E-07   | 0.00469               | 59   |
| INTACT           | 1382 | 25   | 4.03E-07   | 0.00473               | 60   |
| LEUKEMIA         | 1182 | 23   | 4.44E-07   | 0.00521               | 61   |
| INDEPENDENT      | 2840 | 37   | 4.45E-07   | 0.00522               | 62   |
| EACH             | 3117 | 39   | 4.60E-07   | 0.00539               | 63   |
| TAPASIN          | 12   | 5    | 4.76E-07   | 0.00558               | 64   |
| LYSIS            | 169  | 10   | 4.92E-07   | 0.00577               | 65   |
| AUTOIMMUNE       | 557  | 16   | 4.94E-07   | 0.00580               | 66   |
| INDIGENOUS       | 29   | 6    | 5.77E-07   | 0.00677               | 67   |
| PROTEASOME       | 490  | 15   | 6.20E-07   | 0.00728               | 68   |
| LMP2             | 13   | 5    | 6.84E-07   | 0.00803               | 69   |
| LMP7             | 13   | 5    | 6.84E-07   | 0.00803               | 70   |
| PKR              | 30   | 6    | 6.89E-07   | 0.00808               | 71   |
| INDUCIBILITY     | 131  | 9    | 7.86E-07   | 0.00922               | 72   |
| CORRESPONDING    | 2800 | 36   | 1.04E-06   | 0.01214               | 73   |
| MOLECULE         | 3217 | 39   | 1.07E-06   | 0.01254               | 74   |
| DEFENSE          | 370  | 13   | 1.16E-06   | 0.01362               | 75   |
| DIFFERENTIAL     | 1923 | 29   | 1.17E-06   | 0.01368               | 76   |
| ACTION           | 1806 | 28   | 1.18E-06   | 0.01386               | 77   |
| TAP              | 61   | 7    | 1.25E-06   | 0.01471               | 78   |
| STIMULATE        | 2564 | 34   | 1.35E-06   | 0.01581               | 79   |
| CONFER           | 1265 | 23   | 1.41E-06   | 0.01651               | 80   |
| LOAD             | 383  | 13   | 1.67E-06   | 0.01956               | 81   |
| REACTIVITY       | 534  | 15   | 1.72E-06   | 0.02021               | 82   |
| OR-C             | 5    | 4    | 1.79E-06   | 0.02103               | 83   |
| MEDIATE          | 4505 | 47   | 2.06E-06   | 0.02414               | 84   |
| RECOMBINANT      | 2880 | 36   | 2.06E-06   | 0.02420               | 85   |
| CTL              | 154  | 9    | 2.67E-06   | 0.03129               | 86   |
| MICROGLOBULIN    | 39   | 6    | 2.67E-06   | 0.03137               | 87   |
| STRAND           | 1108 | 21   | 2.76E-06   | 0.03238               | 88   |
| RECOGNIZE        | 2007 | 29   | 2.77E-06   | 0.03249               | 89   |
| ALSO             | 6842 | 60   | 3.03E-06   | 0.03554               | 90   |
| DERIVE           | 3496 | 40   | 3.12E-06   | 0.03661               | 91   |
| P69              | 6    | 4    | 3.57E-06   | 0.04188               | 92   |
| VSV              | 19   | 5    | 3.61E-06   | 0.04240               | 93   |
| DOUBLE           | 1235 | 22   | 3.76E-06   | 0.04415               | 94   |

**Table S1. Over-represented abstract terms in the ISG gene list identified using different approaches** (continued)

**(b) Permutation**

| Term                 | Chip | List | Empirical frequency | Empirical $p$ -value | Bonferroni $p$ -value |
|----------------------|------|------|---------------------|----------------------|-----------------------|
| INTERFERON           | 414  | 46   | 0                   | $< 10^{-5}$          | $< 0.0484$            |
| TREAT                | 1817 | 40   | 0                   | $< 10^{-5}$          | $< 0.0484$            |
| INDUCIBLE            | 1068 | 37   | 0                   | $< 10^{-5}$          | $< 0.0484$            |
| IFN                  | 245  | 35   | 0                   | $< 10^{-5}$          | $< 0.0484$            |
| ANTIVIRAL            | 176  | 23   | 0                   | $< 10^{-5}$          | $< 0.0484$            |
| IFN-ALPHA            | 114  | 19   | 0                   | $< 10^{-5}$          | $< 0.0484$            |
| IFN-BETA             | 71   | 18   | 0                   | $< 10^{-5}$          | $< 0.0484$            |
| LYMPHOBLASTOID       | 239  | 16   | 0                   | $< 10^{-5}$          | $< 0.0484$            |
| INTERFERON-ALPHA     | 59   | 14   | 0                   | $< 10^{-5}$          | $< 0.0484$            |
| DSRNA                | 60   | 11   | 0                   | $< 10^{-5}$          | $< 0.0484$            |
| ISRE                 | 31   | 9    | 0                   | $< 10^{-5}$          | $< 0.0484$            |
| EVASION              | 65   | 9    | 0                   | $< 10^{-5}$          | $< 0.0484$            |
| STOMATITIS           | 52   | 9    | 0                   | $< 10^{-5}$          | $< 0.0484$            |
| OLIGOADENYLATE       | 18   | 8    | 0                   | $< 10^{-5}$          | $< 0.0484$            |
| ISG                  | 14   | 7    | 0                   | $< 10^{-5}$          | $< 0.0484$            |
| HLA-CLASS            | 11   | 6    | 0                   | $< 10^{-5}$          | $< 0.0484$            |
| ENCEPHALOMYOCARDITIS | 16   | 6    | 0                   | $< 10^{-5}$          | $< 0.0484$            |
| OR-C                 | 5    | 4    | 0                   | $< 10^{-5}$          | $< 0.0484$            |
| VIRAL                | 892  | 32   | 1                   | $10^{-5}$            | 0.0484                |
| INNATE               | 363  | 21   | 1                   | $10^{-5}$            | 0.0484                |

100,000 randomisations were performed and the smallest  $p$ -values that can be measured directly is thus  $10^{-5}$ . 4840 tokens were being tested in this gene list. So the best possible Bonferroni  $p$ -value attainable is  $10^{-5} \times 4840 = 0.0484$ . Any term with an empirical  $p$ -value less than  $10^{-5}$  is provisionally assigned a value of  $< 10^{-5}$ , and the corresponding Bonferroni  $p$ -value is deemed to be  $< 0.0484$ .

**Table S1. Over-represented abstract terms in the ISG gene list identified using different approaches** (continued)

**(c) Outlier**

| Term                 | Chip | List | Z-score | p-value  | Bonferroni p-value | Rank |
|----------------------|------|------|---------|----------|--------------------|------|
| INTERFERON           | 414  | 46   | -12.7   | 2.88E-37 | 9.81E-34           | 1    |
| IFN                  | 245  | 35   | -9.64   | 2.61E-22 | 8.90E-19           | 2    |
| IFN-BETA             | 71   | 18   | -7.59   | 1.64E-14 | 5.60E-11           | 3    |
| ANTIVIRAL            | 176  | 23   | -6.77   | 6.56E-12 | 2.24E-08           | 4    |
| IFN-ALPHA            | 114  | 19   | -6.72   | 8.80E-12 | 3.00E-08           | 5    |
| INTERFERON-ALPHA     | 59   | 14   | -6.62   | 1.78E-11 | 6.08E-08           | 6    |
| OLIGOADENYLATE       | 18   | 8    | -6.06   | 6.64E-10 | 2.26E-06           | 7    |
| ISG                  | 14   | 7    | -5.76   | 4.12E-09 | 1.41E-05           | 8    |
| ISRE                 | 31   | 9    | -5.70   | 6.06E-09 | 2.06E-05           | 9    |
| DSRNA                | 60   | 11   | -5.39   | 3.49E-08 | 0.00012            | 10   |
| HLA-CLASS            | 11   | 6    | -5.29   | 5.98E-08 | 0.00020            | 11   |
| HLA-A                | 30   | 8    | -5.17   | 1.16E-07 | 0.00039            | 12   |
| HLA-B                | 25   | 7    | -4.82   | 7.07E-07 | 0.00241            | 13   |
| INDUCIBLE            | 1068 | 37   | -4.81   | 7.39E-07 | 0.00252            | 14   |
| ENCEPHALOMYOCARDITIS | 16   | 6    | -4.74   | 1.06E-06 | 0.00361            | 15   |
| STOMATITIS           | 52   | 9    | -4.73   | 1.07E-06 | 0.00365            | 16   |
| OAS                  | 10   | 5    | -4.45   | 4.28E-06 | 0.01459            | 17   |
| HLA-G                | 10   | 5    | -4.45   | 4.28E-06 | 0.01459            | 18   |
| MXA                  | 11   | 5    | -4.33   | 7.56E-06 | 0.02577            | 19   |
| EVASION              | 65   | 9    | -4.32   | 7.59E-06 | 0.02587            | 20   |
| INNATE               | 363  | 21   | -4.29   | 9.13E-06 | 0.03111            | 21   |
| TAPASIN              | 12   | 5    | -4.21   | 1.25E-05 | 0.04275            | 22   |
| VIRAL                | 892  | 32   | -4.20   | 1.31E-05 | 0.04477            | 23   |
| INFECTION            | 1177 | 36   | -4.19   | 1.40E-05 | 0.04772            | 24   |

**Table S1. Over-represented abstract terms in the ISG gene list identified using different approaches** (continued)

**(d) ExtendedHG**

| Term                 | Chip | List | Odds ratio | $p$ -value | Bonferroni $p$ -value | Rank |
|----------------------|------|------|------------|------------|-----------------------|------|
| INTERFERON           | 414  | 46   | 2.07       | 2.24E-35   | 2.12E-31              | 1    |
| IFN                  | 245  | 35   | 2.01       | 1.42E-29   | 1.35E-25              | 2    |
| IFN-BETA             | 71   | 18   | 2.06       | 1.41E-18   | 1.34E-14              | 3    |
| ANTIVIRAL            | 176  | 23   | 2.02       | 1.09E-17   | 1.03E-13              | 4    |
| IFN-ALPHA            | 114  | 19   | 2.04       | 2.62E-16   | 2.49E-12              | 5    |
| INTERFERON-ALPHA     | 59   | 14   | 2.04       | 6.17E-14   | 5.85E-10              | 6    |
| INDUCIBLE            | 1068 | 37   | 1.99       | 1.36E-11   | 1.29E-07              | 7    |
| VIRAL                | 892  | 32   | 1.98       | 4.48E-10   | 4.25E-06              | 8    |
| OLIGOADENYLATE       | 18   | 8    | 2.15       | 8.74E-10   | 8.29E-06              | 9    |
| INFECTION            | 1177 | 36   | 2.00       | 1.01E-09   | 9.61E-06              | 10   |
| DSRNA                | 60   | 11   | 2.03       | 1.09E-09   | 1.03E-05              | 11   |
| INNATE               | 363  | 21   | 2.01       | 1.42E-09   | 1.35E-05              | 12   |
| ISRE                 | 31   | 9    | 2.09       | 1.71E-09   | 1.62E-05              | 13   |
| IFN-GAMMA            | 443  | 22   | 2.00       | 6.73E-09   | 6.38E-05              | 14   |
| ISG                  | 14   | 7    | 2.23       | 9.54E-09   | 9.05E-05              | 15   |
| IMMUNITY             | 387  | 20   | 2.01       | 2.63E-08   | 0.00025               | 16   |
| IMMUNE               | 1275 | 35   | 2.01       | 3.22E-08   | 0.00030               | 17   |
| LYMPHOBLASTOID       | 239  | 16   | 2.01       | 4.58E-08   | 0.00044               | 18   |
| HLA-A                | 30   | 8    | 2.15       | 4.94E-08   | 0.00047               | 19   |
| STOMATITIS           | 52   | 9    | 2.09       | 1.32E-07   | 0.00125               | 20   |
| HLA-CLASS            | 11   | 6    | 2.35       | 1.60E-07   | 0.00152               | 21   |
| TREAT                | 1817 | 40   | 2.03       | 3.50E-07   | 0.00332               | 22   |
| HLA-B                | 25   | 7    | 2.23       | 5.00E-07   | 0.00475               | 23   |
| EVASION              | 65   | 9    | 2.09       | 7.75E-07   | 0.00735               | 24   |
| VIRUS                | 1408 | 34   | 1.99       | 9.37E-07   | 0.00889               | 25   |
| MHC                  | 353  | 17   | 2.01       | 1.21E-06   | 0.0115                | 26   |
| ENCEPHALOMYOCARDITIS | 16   | 6    | 2.35       | 1.44E-06   | 0.0136                | 27   |

Figure S1

Boxplot of PMID counts grouped by consensus gene age (HG-U133A array)

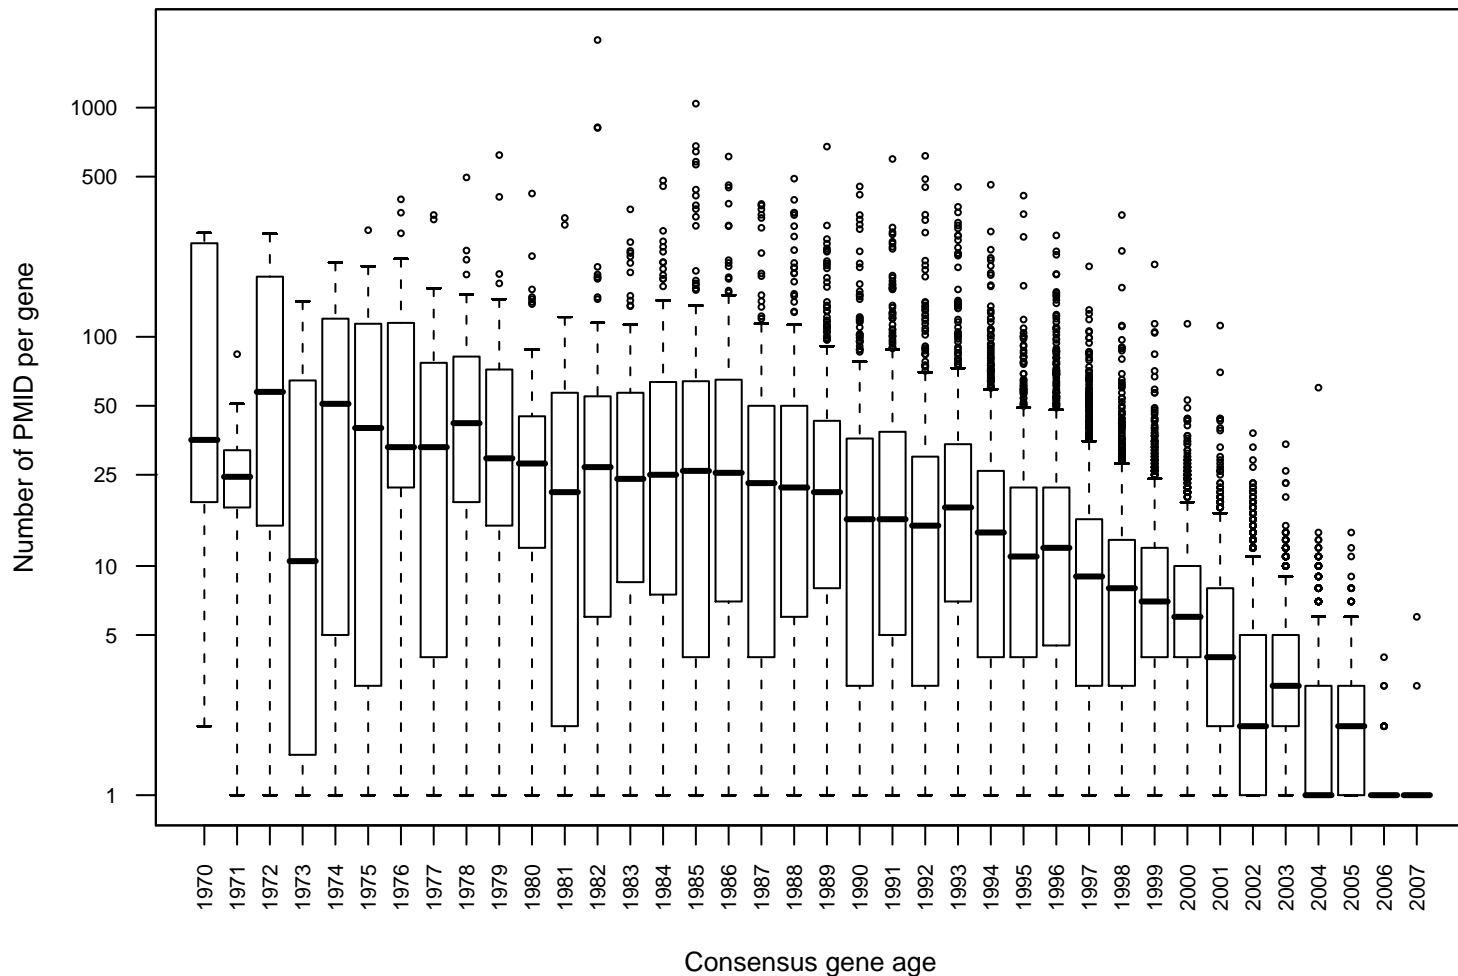

Figure S2

Concordance plot

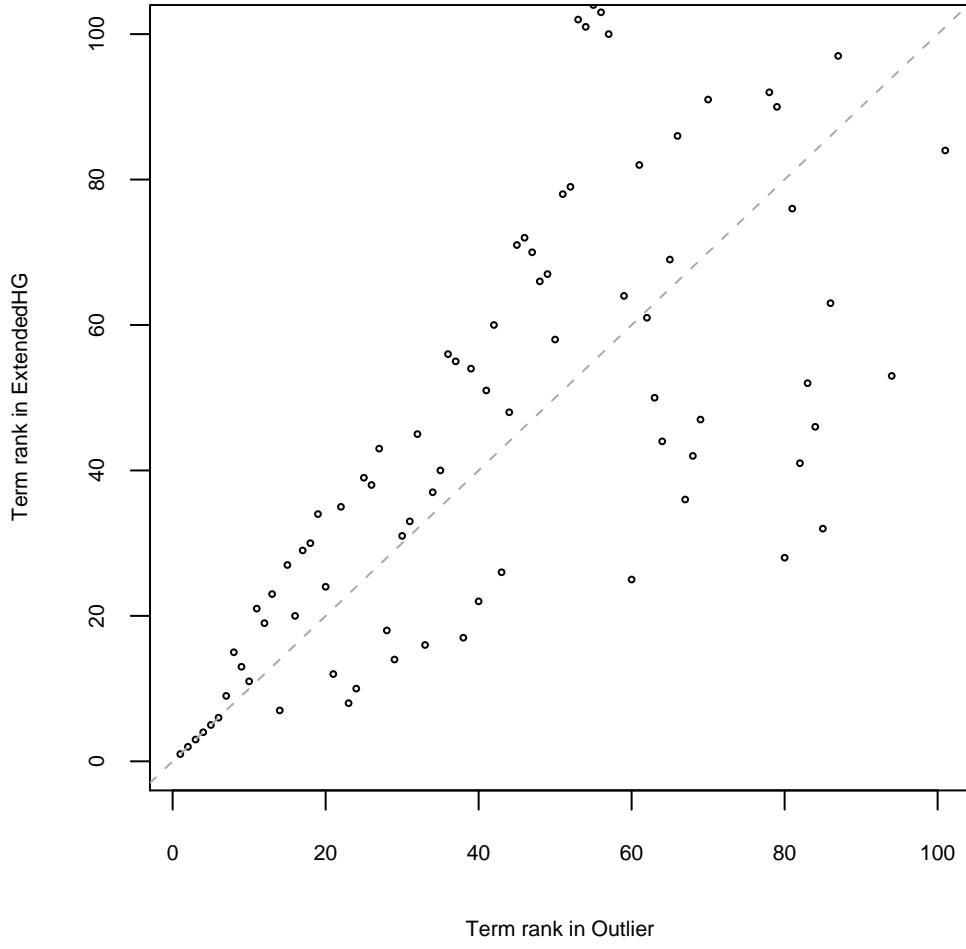



# Figure S3

## Histograms of hits across different species in Outlier

### HG-U133A (n=52)

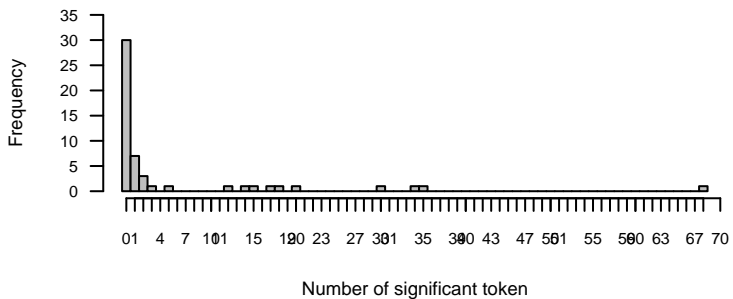

### HG-U133 Plus 2.0 (n=54)

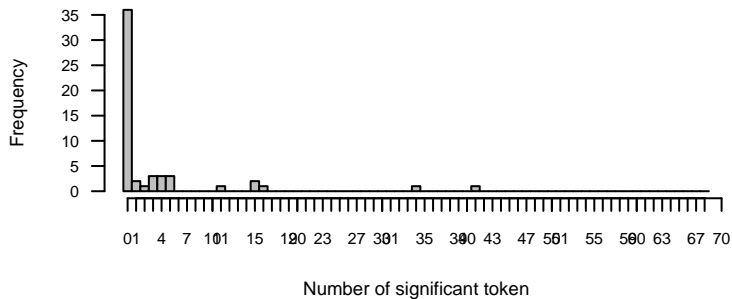

### Mouse 430 2.0 (n=40)

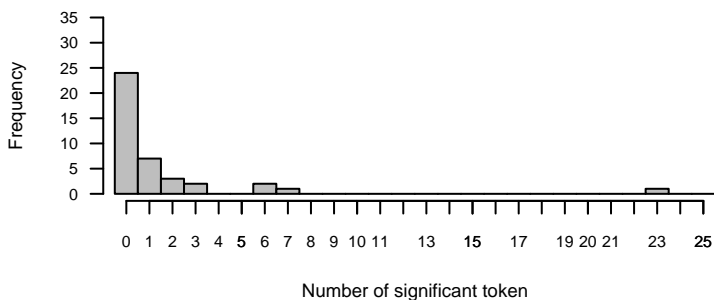

### Rat 230 2.0 (n=27)

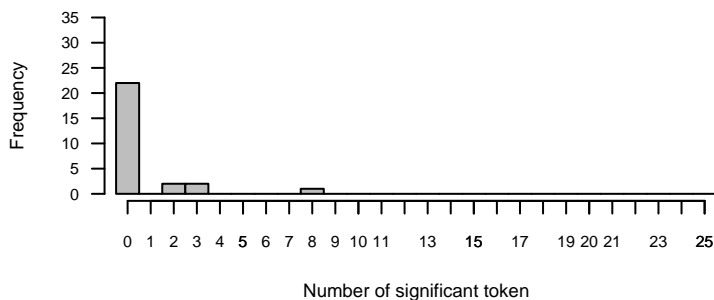

### Arabidopsis ATH1 (n=67)

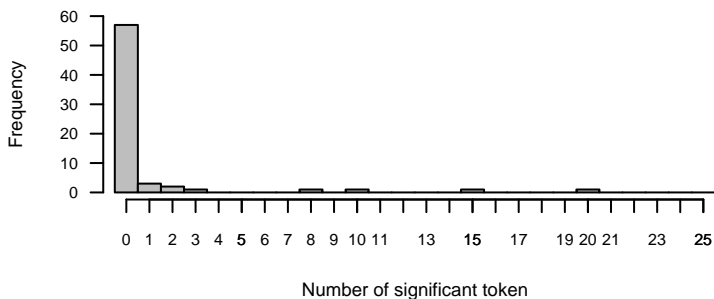

### DrosGenome1 (n=44)

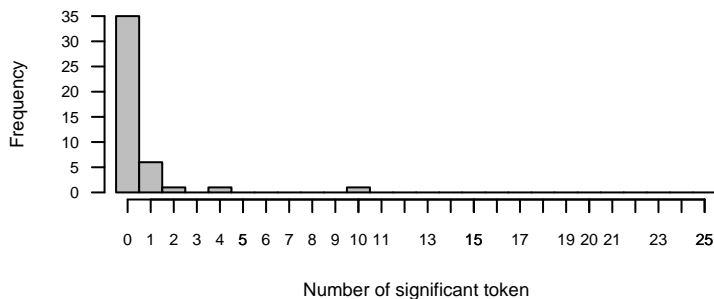

### Drosophila 2.0 (n=19)

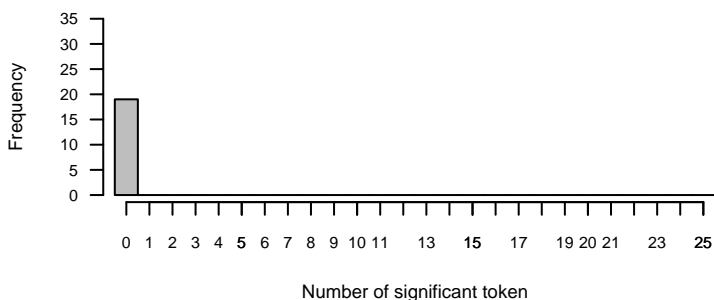

### Xenopus laevis (n=22)

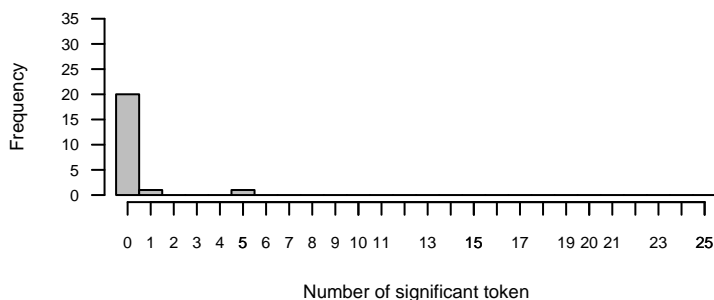

### C. elegans (n=15)

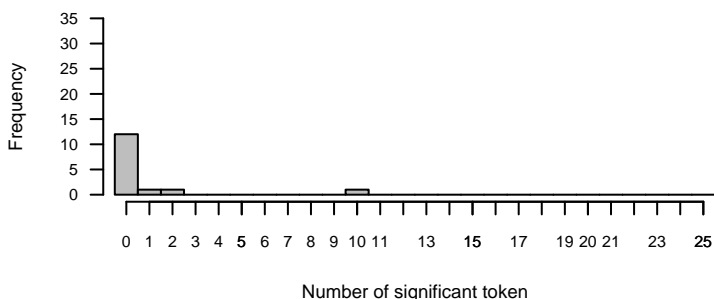

### Zebrafish (n=14)

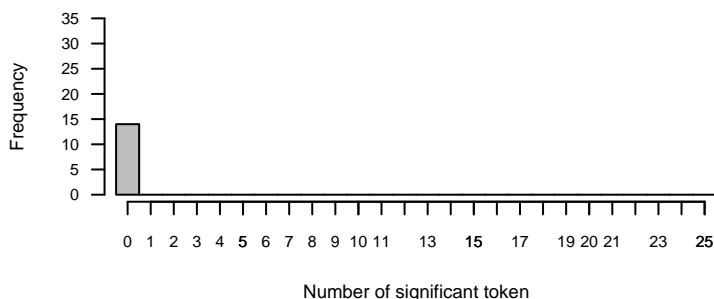

# Figure S4

## Histograms of hits across different species in ExtendedHG

### HG-U133A (n=52)

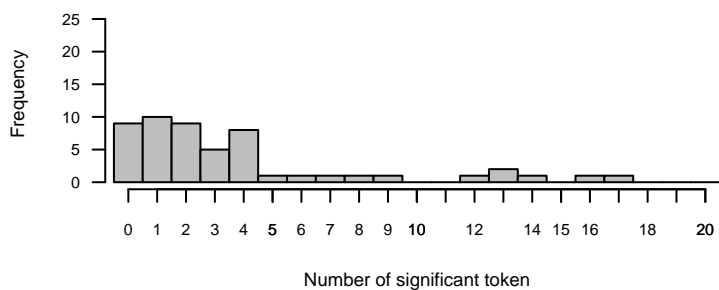

### HG-U133 Plus 2.0 (n=54)

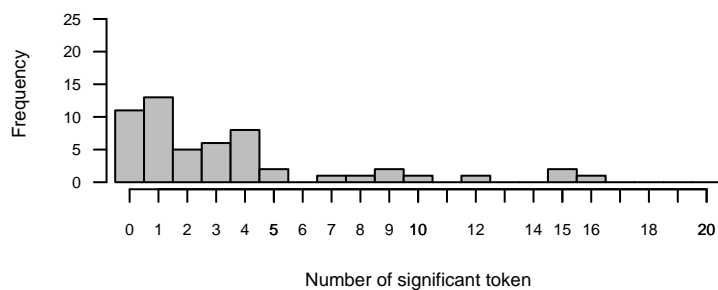

### Mouse 430 2.0 (n=40)

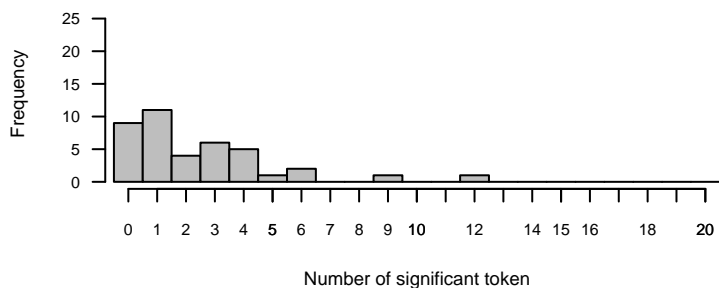

### Rat 230 2.0 (n=27)

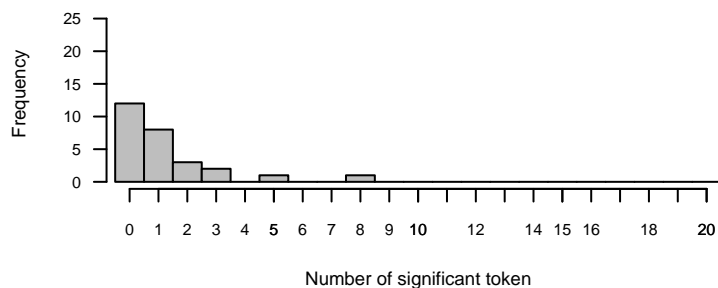

### Arabidopsis ATH1 (n=67)

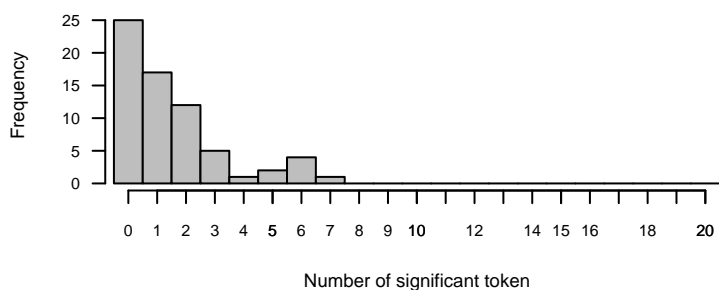

### DrosGenome1 (n=44)

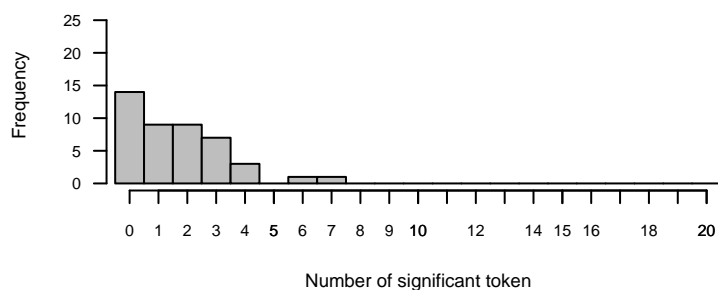

### Drosophila 2.0 (n=19)

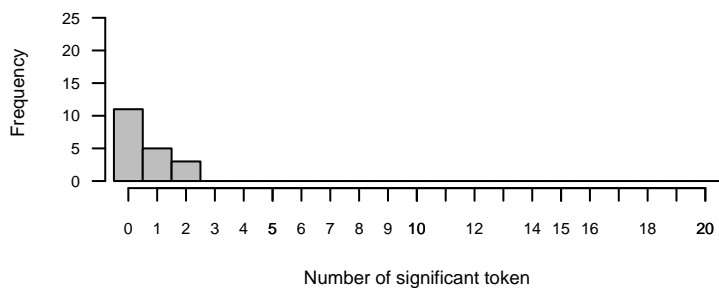

### Xenopus laevis (n=22)

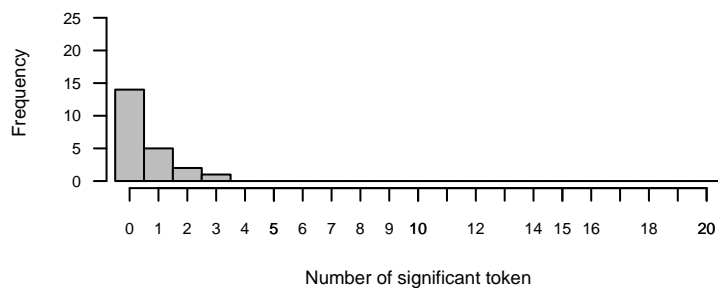

### C. elegans (n=15)

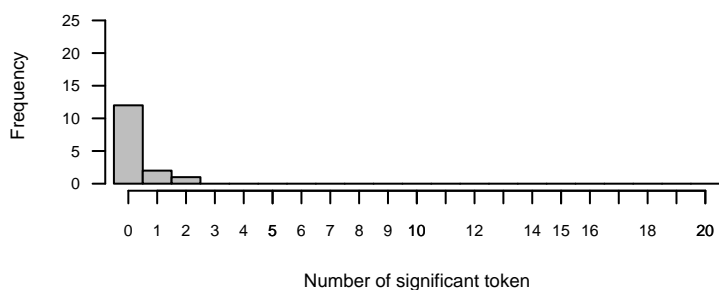

### Zebrafish (n=14)

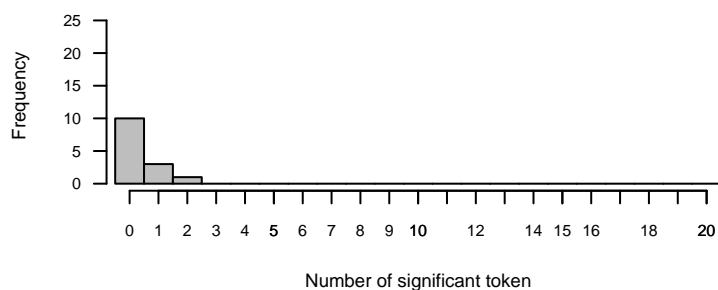

Figure S5

Outlier detection diagnostic plots

(a) Fitted means ~ List frequency

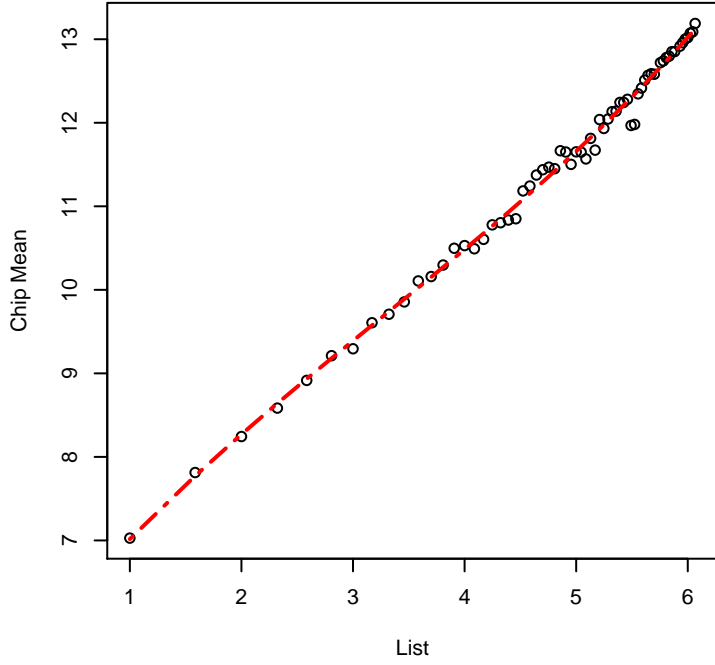

(b) Fitted SD ~ List frequency

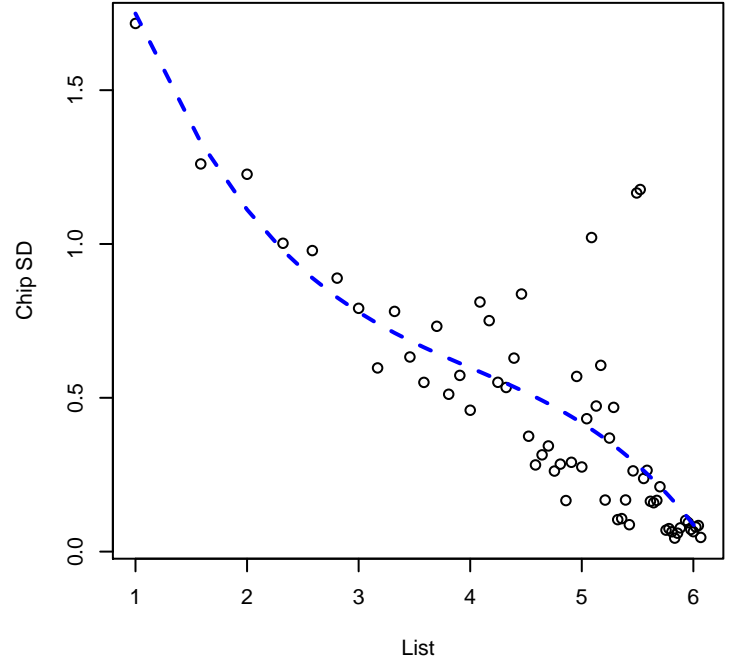

(c) Mean  $\pm$  3 SD lines before smoothing

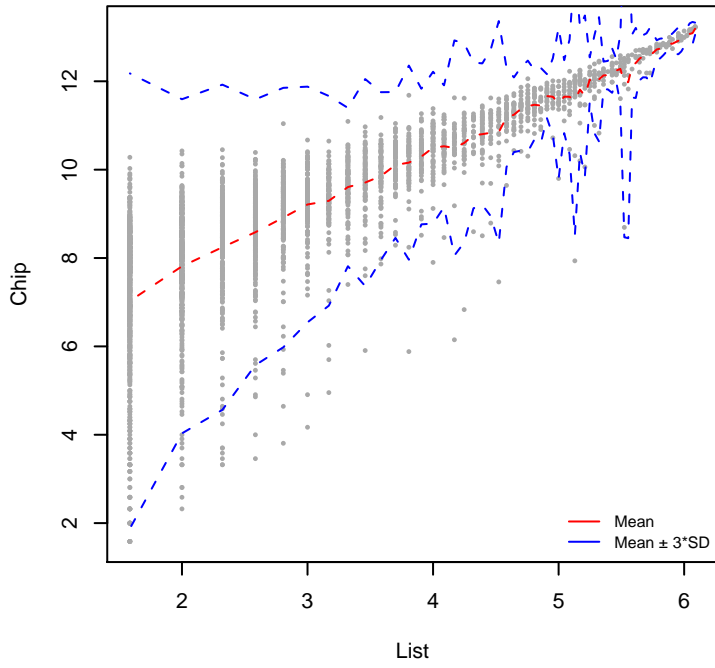

(d) Locally smoothed mean  $\pm$  3 SD lines

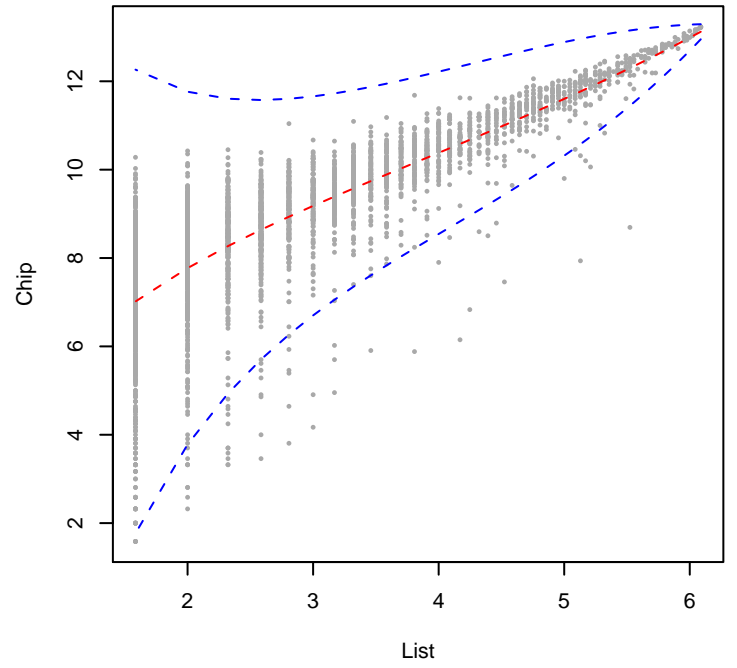

Supplement: gkp310_1.pdf [file gkp310_1.pdf]
