# Supplementary material for: Text-based over-representation analysis of microarray gene lists with annotation bias
Source: PubMed Central journal article supplement — Nucleic Acids Res. 2009 May 8;37(11):e79. doi: 10.1093/nar/gkp310 (PMC2699530; doi:10.1093/nar/gkp310), 2009-05-08
Supplement: gkp310_2.pdf [file gkp310_2.pdf]

## Details of literature gene lists

### HG-U133A

| Gene list ID | Probesets number | PMID     | Source                           | Description                                                                                                                                                   |
|--------------|------------------|----------|----------------------------------|---------------------------------------------------------------------------------------------------------------------------------------------------------------|
| hs1a         | 867              | 16531451 | Provenzani <i>et al.</i> , 2006  | Probesets differentially expressed in the total RNA sample. Extracted from Supplementary Table I.                                                             |
| hs1b         | 2018             | 16531451 | Provenzani <i>et al.</i> , 2006  | Probesets changed in the polysomal RNA sample. Extracted from Supplementary Table II.                                                                         |
| hs1c         | 397              | 16531451 | Provenzani <i>et al.</i> , 2006  | Probesets common to polysomal and total RNA sample. Extracted from Supplementary Table III.                                                                   |
| hs2a         | 269              | 15210650 | Lee <i>et al.</i> , 2004         | Transcripts with greater than 3-fold enrichment in every T cell subpopulation compared to TSC. Extracted from Supplementary Table 1.                          |
| hs2b         | 1521             | 15210650 | Lee <i>et al.</i> , 2004         | Transcripts whose expression changed by more than 3-fold during T cell differentiation. Extracted from Supplementary Table 2.                                 |
| hs2c         | 134              | 15210650 | Lee <i>et al.</i> , 2004         | Transcripts enriched in both ITTP and DP by more than 3-fold. Extracted from Supplementary Table 3-1.                                                         |
| hs2d         | 76               | 15210650 | Lee <i>et al.</i> , 2004         | Transcripts enriched in more mature cells (SP4, CB4, and AB4) by more than 3-fold. Extracted from Supplementary Table 3-2.                                    |
| hs2e         | 28               | 15210650 | Lee <i>et al.</i> , 2004         | Transcripts enriched by more than 3-fold in ITTP compared to other lymphocytes. Extracted from Supplementary Table 3-3.                                       |
| hs2f         | 28               | 15210650 | Lee <i>et al.</i> , 2004         | Transcripts enriched by more than 3-fold in DP compared to other lymphocytes. Extracted from Supplementary Table 3-4.                                         |
| hs2g         | 16               | 15210650 | Lee <i>et al.</i> , 2004         | Transcripts enriched by more than 3-fold in SP4 compared to other lymphocytes. Extracted from Supplementary Table 3-5.                                        |
| hs2h         | 25               | 15210650 | Lee <i>et al.</i> , 2004         | Transcripts enriched in naïve CD4 T cells (CB4, and AB4) by more than 3-fold. Extracted from Supplementary Table 3-6.                                         |
| hs2i         | 32               | 15210650 | Lee <i>et al.</i> , 2004         | Transcripts showing SP4>CB4>AB4 pattern. Extracted from Supplementary Table 4-1.                                                                              |
| hs2j         | 240              | 15210650 | Lee <i>et al.</i> , 2004         | Transcripts showing more than 2 fold higher expression in CB4 than in AB4. Extracted from Supplementary Table 4-2.                                            |
| hs3a         | 400              | 15897907 | Farmer <i>et al.</i> , 2005      | Genes which best discriminate apocrine vs luminal (AL). Extracted from Supplementary Table Sheet 2.                                                           |
| hs3b         | 400              | 15897907 | Farmer <i>et al.</i> , 2005      | Genes which best discriminate apocrine vs basal (AB). Extracted from Supplementary Table Sheet 2.                                                             |
| hs3c         | 400              | 15897907 | Farmer <i>et al.</i> , 2005      | Genes which best discriminate basal vs luminal (BL). Extracted from Supplementary Table Sheet 2.                                                              |
| hs4a         | 181              | 16260967 | Radom-Aizik <i>et al.</i> , 2005 | Genes whose expression increased after training. Extracted from Table S2 in the main paper.                                                                   |
| hs4b         | 216              | 16260967 | Radom-Aizik <i>et al.</i> , 2005 | Genes whose expression decreased after training. Extracted from Table S3 in the main paper.                                                                   |
| hs5a         | 135              | 12958056 | Gimino <i>et al.</i> , Sep 2003  | Genes that are up-regulated in gene expression in acute rejection vs. no rejection (False Discovery Rate = 0.94%). Extracted from Supplementary Table E1.     |
| hs5b         | 858              | 12958056 | Gimino <i>et al.</i> , Sep 2003  | Genes with significant changes in gene expression in acute rejection vs. no rejection (False Discovery Rate = 4.63 %). Extracted from Supplementary Table E2. |
| hs6a         | 181              | 16319128 | Vanharanta <i>et al.</i> , 2006  | Down-regulated genes in FH mutant relative to FH wild-type fibroids. Extracted from Supplementary Table 1.                                                    |

Details of literature gene lists (continued)

HG-U133A

| Gene list ID | Probesets number | PMID     | Source                          | Description                                                                                                                                                          |
|--------------|------------------|----------|---------------------------------|----------------------------------------------------------------------------------------------------------------------------------------------------------------------|
| hs6b         | 179              | 16319128 | Vanharanta <i>et al.</i> , 2006 | Up-regulated genes in FH mutant relative to FH wild-type fibroids. Extracted from Supplementary Table 1.                                                             |
| hs6c         | 228              | 16319128 | Vanharanta <i>et al.</i> , 2006 | Down-regulated genes in FH mutant relative to normal myometrium. Extracted from Supplementary Table 3.                                                               |
| hs6d         | 199              | 16319128 | Vanharanta <i>et al.</i> , 2006 | Up-regulated genes in FH mutant relative to normal myometrium. Extracted from Supplementary Table 3.                                                                 |
| hs7          | 1434             | 15817885 | Barth <i>et al.</i> , 2005      | Genes differentially expressed in atrial fibrillation. Extracted from Supplementary Table 3.                                                                         |
| hs8          | 412              | 15971941 | Barberi <i>et al.</i> , 2005    | Genes shared between primary and hESC-derived mesenchymal precursors but significantly different from undifferentiated hESCs. Extracted from Supplementary Table S2. |
| hs9a         | 26               | 15558013 | O'Donnell <i>et al.</i> , 2005  | Genes down-regulated in N+ primary tumours. Extracted from Supplementary Figure 1.                                                                                   |
| hs9b         | 93               | 15558013 | O'Donnell <i>et al.</i> , 2005  | Genes up-regulated in N+ primary tumours. Extracted from Supplementary Figure 1.                                                                                     |
| hs10         | 256              | 16203770 | Best <i>et al.</i> , 2005       | Unabridged list of genes differentially expressed between AD and AI prostate cancer. Extracted from Supplementary Data.                                              |
| hs11a        | 113              | 16049480 | Minn <i>et al.</i> , 2005       | Genes differentially expressed between parental MDA-MB-231 and LM2 cell lines selected to be highly metastatic to lung. Extracted from Supplementary Table 2.        |
| hs11b        | 65               | 16049480 | Minn <i>et al.</i> , 2005       | Lung metastasis candidate genes. Extracted from Supplementary Table 4.                                                                                               |
| hs12a        | 2707             | 16089502 | Eckfeldt <i>et al.</i> , 2005   | Probesets differentially expressed between umbilical cord blood derived Rho-lo and Rho-hi cells. Extracted from Supplementary Table S1.                              |
| hs12b        | 4677             | 16089502 | Eckfeldt <i>et al.</i> , 2005   | Probesets differentially expressed between adult bone marrow derived Rho-lo and Rho-hi cells. Extracted from Supplementary Table S2.                                 |
| hs12c        | 304              | 16089502 | Eckfeldt <i>et al.</i> , 2005   | Probesets differentially expressed between Rho-lo and Rho-hi cells from both umbilical cord blood and adult bone marrow. Extracted from Supplementary Table S3.      |
| hu13         | 235              | 16205643 | Liu <i>et al.</i> , 2006        | Genes induced by c-Myb and v-Myb in MCF-7 cells. Extracted from Supplementary Table 1.                                                                               |
| hs14a        | 299              | 14872006 | Hall <i>et al.</i> , 2004       | Genes differentially expressed in 19 paired human samples comparing pre and post mechanical unloading with a LVAD. Extracted from Supplementary Table S1.            |
| hs14b        | 144              | 14872006 | Hall <i>et al.</i> , 2004       | Genes differentially expressed in Non-Ischemic Cohort. Extracted from Supplementary Table S3.                                                                        |
| hs14c        | 97               | 14872006 | Hall <i>et al.</i> , 2004       | Genes differentially expressed in Ischemic Cohort. Extracted from Supplementary Table 4.                                                                             |
| hs14d        | 22               | 14872006 | Hall <i>et al.</i> , 2004       | Genes differentially expressed in Acute MI Cohort. Extracted from Supplementary Table 5.                                                                             |
| hs15a        | 104              | 12756304 | Cousins <i>et al.</i> , 2003    | Group 1 zinc responsive genes. Extracted from Supplementary Table 3.                                                                                                 |
| hs15b        | 86               | 12756304 | Cousins <i>et al.</i> , 2003    | Group 4 zinc responsive genes. Extracted from Supplementary Table 4.                                                                                                 |
| hs16         | 57               | 16116475 | Chow <i>et al.</i> , 2006       | Genes differentially expressed in C666-1 RASSF1A-transfected clones. Extracted from Table 1 in the original paper.                                                   |

**Details of literature gene lists (continued)**

**HG-U133A**

| <b>Gene list ID</b> | <b>Probesets number</b> | <b>PMID</b> | <b>Source</b>                  | <b>Description</b>                                                                                                                                                  |
|---------------------|-------------------------|-------------|--------------------------------|---------------------------------------------------------------------------------------------------------------------------------------------------------------------|
| hs17a               | 73                      | 16804116    | Chng <i>et al.</i> , 2006      | Genes that displayed distinct expression profile in WM compared to CLL and MM. Extracted from Supplementary Table S1: WM Unique Genes.                              |
| hs17b               | 1247                    | 16804116    | Chng <i>et al.</i> , 2006      | Genes that displayed distinct expression profile in MM compared to WM and CLL. Extracted from Supplementary Table S1: MM Unique Genes                               |
| hs17c               | 396                     | 16804116    | Chng <i>et al.</i> , 2006      | Genes that displayed distinct expression profile in CLL compared to WM and MM. Extracted from Supplementary Table S1: CLL Unique Genes.                             |
| hs17d               | 314                     | 16804116    | Chng <i>et al.</i> , 2006      | A cluster of genes that were over-expressed in B-cell, WM and CLL. Extracted from Supplementary Table S1: WM CLL B-cell cluster.                                    |
| hs18a               | 46                      | 16836768    | Pfoertner <i>et al.</i> , 2006 | Up-regulated genes comparing CD4+CD25+ T cells vs CD4+CD25- T cells. Extracted from Additional file 1.                                                              |
| hs18b               | 21                      | 16836768    | Pfoertner <i>et al.</i> , 2006 | Down-regulated genes comparing CD4+CD25+ T cells vs CD4+CD25- T cells. Extracted from Additional file 1.                                                            |
| hs18c               | 313                     | 16836768    | Pfoertner <i>et al.</i> , 2006 | Genes differentially expressed in Foxp3 over-expressing CD4+ Th cell lines cells relative to the GFP transduced CD4+ Th controls. Extracted from Additional file 4. |
| hs19a               | 262                     | 15869706    | Rosty <i>et al.</i> , 2005     | Up-regulated genes in FGFR3 mutated tumours relative to FGFR3 wild type tumours. Extracted from Additional file 2: Positive Significant Genes.                      |
| hs19b               | 552                     | 15869706    | Rosty <i>et al.</i> , 2005     | Down-regulated genes in FGFR3 mutated tumours relative to FGFR3 wild type tumours. Extracted from Additional file 2: Negative Significant Genes                     |
| hs20                | 1207                    | 15604246    | Berger <i>et al.</i> , 2004    | Genes differentially expressed between LHSR and LHS. Extracted from Supplementary Table 1.                                                                          |

## Details of literature gene lists (continued)

### HG-U133 Plus 2.0

| Gene list ID | Probesets number | PMID     | Source                         | Description                                                                                                                                                                                                                                                                |
|--------------|------------------|----------|--------------------------------|----------------------------------------------------------------------------------------------------------------------------------------------------------------------------------------------------------------------------------------------------------------------------|
| hu1          | 1191             | 15361855 | Donninger <i>et al.</i> , 2004 | Differentially regulated genes identified in advanced papillary serous tumor specimens. Extracted from Supplementary Table S1.                                                                                                                                             |
| hu2          | 1527             | 16205643 | Liu <i>et al.</i> , 2006       | Genes induced by c-Myb and v-Myb in human monocytes. Extracted from Supplementary Table 3.                                                                                                                                                                                 |
| hu3a         | 81               | 16982809 | Szatmari <i>et al.</i> , 2006  | Genes regulated by PPAR-gamma agonist, RAR-alpha agonists and the RAR-alpha antagonist (referred to as cluster 3 in the main text). Extracted from Supplementary Table S1.                                                                                                 |
| hu3b         | 72               | 16982809 | Szatmari <i>et al.</i> , 2006  | Genes down-regulated by PPAR-gamma ligand (referred to as cluster 6 in the main text). Extracted from Supplementary Table S2.                                                                                                                                              |
| hu4a         | 195              | 16926187 | Vendelin <i>et al.</i> , 2006  | Genes differentially expressed in contrasts 1 and 2 (NPS stimulated versus unstimulated NPSR1-A cells, and NPS stimulated NPSR1-A versus NPS stimulated HEK-293H, respectively). Extracted from Supplementary Table S1.                                                    |
| hu4b         | 43               | 16926187 | Vendelin <i>et al.</i> , 2006  | Co-regulated genes. Extracted from Supplementary Table 3.                                                                                                                                                                                                                  |
| hu5a         | 690              | 16210406 | Jaatinen <i>et al.</i> , 2006  | Differentially expressed genes in CD133+ relative to CD133-. Extracted from Supplementary Table 2.                                                                                                                                                                         |
| hu5b         | 257              | 16210406 | Jaatinen <i>et al.</i> , 2006  | Genes expressed only in CD133+ and absent in CD133- samples. Extracted from Supplementary Table 3.                                                                                                                                                                         |
| hu6          | 225              | 16242812 | Dunckley <i>et al.</i> , 2006  | Genes whose expression differed significantly when comparing ND non-NFT neurons to AD non-NFT neurons and then to AD NFT neurons. Data downloaded from <a href="http://www.tgen.org/research/index.cfm?pageid=502">http://www.tgen.org/research/index.cfm?pageid=502</a> . |
| hu7          | 50               | 16949412 | Hassan <i>et al.</i> , 2006    | Top 50 probesets that displayed differential expression between TL samples and TNL samples. Extracted from Table II in the main paper.                                                                                                                                     |
| hu8a         | 724              | 16772347 | Lampron <i>et al.</i> , 2006   | Complete list of probesets statistically related to GIP-dependent AIMAH. Extracted from Supplementary Table 2.                                                                                                                                                             |
| hu8b         | 94               | 16772347 | Lampron <i>et al.</i> , 2006   | Probesets with intensity levels linked to the presence of a GIP-dependent nodule. Extracted from Supplementary Table 4.                                                                                                                                                    |
| hu9a         | 51               | 16728703 | Zhan <i>et al.</i> , 2006      | Top 50 over-expressed genes unique to PR subgroup. Extracted from Supplementary Table S2.                                                                                                                                                                                  |
| hu9b         | 56               | 16728703 | Zhan <i>et al.</i> , 2006      | Top 50 over-expressed genes unique to LB subgroup. Extracted from Supplementary Table S2.                                                                                                                                                                                  |
| hu9c         | 52               | 16728703 | Zhan <i>et al.</i> , 2006      | Top 50 over-expressed genes unique to MS subgroup. Extracted from Supplementary Table S2.                                                                                                                                                                                  |
| hu9d         | 53               | 16728703 | Zhan <i>et al.</i> , 2006      | Top 50 over-expressed genes unique to HY subgroup. Extracted from Supplementary Table S2.                                                                                                                                                                                  |
| hu9e         | 53               | 16728703 | Zhan <i>et al.</i> , 2006      | Top 50 over-expressed genes unique to CD-1 subgroup. Extracted from Supplementary Table S2.                                                                                                                                                                                |
| hu9f         | 57               | 16728703 | Zhan <i>et al.</i> , 2006      | Top 50 over-expressed genes unique to CD-2 subgroup. Extracted from Supplementary Table S2.                                                                                                                                                                                |
| hu9g         | 52               | 16728703 | Zhan <i>et al.</i> , 2006      | Top 50 over-expressed genes unique to MF subgroup. Extracted from Supplementary Table S2.                                                                                                                                                                                  |

## Details of literature gene lists (continued)

### HG-U133 Plus 2.0

| Gene list ID | Probesets number | PMID     | Source                         | Description                                                                                                                                       |
|--------------|------------------|----------|--------------------------------|---------------------------------------------------------------------------------------------------------------------------------------------------|
| hu9h         | 52               | 16728703 | Zhan <i>et al.</i> , 2006      | Top 50 under-expressed genes unique to PR subgroup. Extracted from Supplementary Table S3.                                                        |
| hu9i         | 58               | 16728703 | Zhan <i>et al.</i> , 2006      | Top 50 under-expressed genes unique to LB subgroup. Extracted from Supplementary Table S3.                                                        |
| hu9j         | 55               | 16728703 | Zhan <i>et al.</i> , 2006      | Top 50 under-expressed genes unique to MS subgroup. Extracted from Supplementary Table S3.                                                        |
| hu9k         | 54               | 16728703 | Zhan <i>et al.</i> , 2006      | Top 50 under-expressed genes unique to HY subgroup. Extracted from Supplementary Table S3.                                                        |
| hu9l         | 55               | 16728703 | Zhan <i>et al.</i> , 2006      | Top 50 under-expressed genes unique to CD-1 subgroup. Extracted from Supplementary Table S3.                                                      |
| hu9m         | 54               | 16728703 | Zhan <i>et al.</i> , 2006      | Top 50 under-expressed genes unique to CD-2 subgroup. Extracted from Supplementary Table S3.                                                      |
| hu9n         | 58               | 16728703 | Zhan <i>et al.</i> , 2006      | Top 50 under-expressed genes unique to MF subgroup. Extracted from Supplementary Table S3.                                                        |
| hu9o         | 172              | 16728703 | Zhan <i>et al.</i> , 2006      | Genes commonly dysregulated in CD-1 and CD-2 groups. Extracted from Supplementary Table S5.                                                       |
| hu9p         | 131              | 16728703 | Zhan <i>et al.</i> , 2006      | Genes that were differentially expression between CD-1 and CD-2 subgroups. Extracted from Supplementary Table S6.                                 |
| hu10         | 157              | 16670265 | Radmacher <i>et al.</i> , 2006 | Bullinger Validation Signature that separated AML from normal karyotype. Extracted from Supplementary Table S1.                                   |
| hu11         | 70               | 16953664 | Maier <i>et al.</i> , 2006     | Genes differentially expressed in response to retrovirally mediated MDR1 over-expression. Extracted from Table 1 in the original paper.           |
| hu12a        | 4176             | 16638148 | Oudes <i>et al.</i> , 2006     | Genes detected in sorted cells but not in the whole tissue. Extracted from Supplementary Table 2.                                                 |
| hu12b        | 239              | 16638148 | Oudes <i>et al.</i> , 2006     | Genes detected in whole prostate but not in sorted cells. Extracted from Supplementary Table 4.                                                   |
| hu12c        | 197              | 16638148 | Oudes <i>et al.</i> , 2006     | Genes detected only in prostate luminal cells. Extracted from Supplementary Table 5.                                                              |
| hu12d        | 150              | 16638148 | Oudes <i>et al.</i> , 2006     | Genes detected only in prostate basal cells. Extracted from Supplementary Table 6.                                                                |
| hu12e        | 632              | 16638148 | Oudes <i>et al.</i> , 2006     | Genes detected only in prostate stromal cells. Extracted from Supplementary Table 7.                                                              |
| hu13         | 123              | 16863911 | Fruehauf <i>et al.</i> , 2006  | Genes differentially expressed in AMD3100 + G-CSF-mobilized PBPC compared to G-CSF-mobilized cells. Extracted from Table 1 in the original paper. |
| hu14         | 361              | 16474848 | Hooi <i>et al.</i> , 2006      | Genes present 2 fold expression changes by ST7-1a expression in PC-3 cells. Extracted from Supplementary table.                                   |
| hu15a        | 183              | 16682435 | Peddada <i>et al.</i> , 2006   | Genes significantly increased upon differentiation. Extracted from Supplementary Table 1.                                                         |
| hu15b        | 12               | 16682435 | Peddada <i>et al.</i> , 2006   | Genes significantly increased upon differentiation and significantly increased in D-UT vs. D-MT comparison. Extracted from Supplementary Table 2. |
| hu15c        | 8                | 16682435 | Peddada <i>et al.</i> , 2006   | Genes significantly increased upon differentiation and significantly decreased in D-UT vs. D-MT comparison. Extracted from Supplementary Table 3. |
| hu15d        | 45               | 16682435 | Peddada <i>et al.</i> , 2006   | Genes significantly decreased upon differentiation. Extracted from Supplementary Table 4.                                                         |

## Details of literature gene lists (continued)

### HG-U133 Plus 2.0

| Gene list ID | Probesets number | PMID     | Source                                | Description                                                                                                                                                                                 |
|--------------|------------------|----------|---------------------------------------|---------------------------------------------------------------------------------------------------------------------------------------------------------------------------------------------|
| hu15e        | 4                | 16682435 | Peddada <i>et al.</i> , 2006          | Genes significantly decreased upon differentiation and significantly increased in D-UT vs. D-MT comparison. Extracted from Supplementary Table 5.                                           |
| hu15f        | 26               | 16682435 | Peddada <i>et al.</i> , 2006          | Genes significantly changed upon differentiation in D-MD vs. D-CD comparison. Extracted from Supplementary Table 6.                                                                         |
| hu16         | 133              | 16507782 | Mense <i>et al.</i> , 2006            | Hypoxia-induced/suppressed genes in both astrocytes and HeLa cells. Extracted from Table S1.                                                                                                |
| hu17         | 1521             | 16785517 | Fulcher <i>et al.</i> , 2006          | Genes differentially expressed between LPS and galectin-1-treated MDDCs. Extracted from Supplementary Table 1.                                                                              |
| hu18         | 859              | 16379004 | DeFilippis <i>et al.</i> , 2006       | Differentially regulated genes between HCMV-infected versus uninfected human fibroblasts treated with control siRNA at both 4h and 8h post-infection. Extracted from Supplementary Table 1. |
| hu19a        | 1233             | 16288205 | Charafe-Jauffret <i>et al.</i> , 2006 | Probesets significantly differentially expressed between luminal cell lines and basal cell lines. Supplementary. Extracted from Supplementary Table 2.                                      |
| hu19b        | 1309             | 16288205 | Charafe-Jauffret <i>et al.</i> , 2006 | Probesets significantly differentially expressed between luminal cell lines and mesenchymal cell lines. Extracted from Supplementary Table 3.                                               |
| hu19c        | 227              | 16288205 | Charafe-Jauffret <i>et al.</i> , 2006 | Probesets significantly differentially expressed between basal cell lines and mesenchymal cell lines. Extracted from Supplementary Table 4.                                                 |
| hu20a        | 205              | 16644866 | Armstrong <i>et al.</i> , 2006        | hESC-specific transcripts. Extracted from Supplementary Table S1.                                                                                                                           |
| hu20b        | 84               | 16644866 | Armstrong <i>et al.</i> , 2006        | Highly expressed transcripts in both hES-NCL1 and H1 cell lines. Extracted from Supplementary Table S2.                                                                                     |
| hu20c        | 61               | 16644866 | Armstrong <i>et al.</i> , 2006        | Genes which were unique to hES-NCL1. Extracted from Supplementary Table S3.                                                                                                                 |
| hu20d        | 49               | 16644866 | Armstrong <i>et al.</i> , 2006        | Genes which were unique to H1. Extracted from Supplementary Table S3.                                                                                                                       |
| hu20e        | 110              | 16644866 | Armstrong <i>et al.</i> , 2006        | New hESC markers. Extracted from Supplementary Table S4.                                                                                                                                    |

## Details of literature gene lists (continued)

### Mouse 430 2.0

| Gene list ID | Probesets number | PMID     | Source                           | Description                                                                                                                                                                        |
|--------------|------------------|----------|----------------------------------|------------------------------------------------------------------------------------------------------------------------------------------------------------------------------------|
| ms1          | 294              | 16949565 | Yu <i>et al.</i> , 2006          | Significantly differentially expressed genes in Get-1-/- back skin relative to wild-type. Extracted from Supplementary Table 4.                                                    |
| ms2a         | 490              | 16860309 | Potireddy <i>et al.</i> , 2006   | List of transcripts enriched at MII stage. Extracted from Supplementary Table 2.                                                                                                   |
| ms2b         | 1808             | 16860309 | Potireddy <i>et al.</i> , 2006   | Genes enhanced in the late one-cell embryos. Extracted from Supplementary Table 3.                                                                                                 |
| ms3a         | 185              | 16368875 | Mitchell <i>et al.</i> , 2006    | Genes differentially expressed in HRas-v12 hearts (RAS-regulated). Extracted from Supplementary Table 2.                                                                           |
| ms3b         | 251              | 16368875 | Mitchell <i>et al.</i> , 2006    | Genes differentially expressed in MKK3bE hearts (p38-regulated). Extracted from Supplementary Table 2.                                                                             |
| ms3c         | 257              | 16368875 | Mitchell <i>et al.</i> , 2006    | Genes differentially expressed in MKK7D hearts (JNK-regulated). Extracted from Supplementary Table 2.                                                                              |
| ms4a         | 98               | 16940520 | Kunz <i>et al.</i> , 2006        | Genes whose expression is consistently changed between LCMV-cgPi and mock infected animals. Extracted from Supplementary Table S1.                                                 |
| ms4b         | 77               | 16940520 | Kunz <i>et al.</i> , 2006        | Genes whose expression is significantly changed between the two mock animals. Extracted from Supplementary Table S2.                                                               |
| ms5          | 1583             | 16943279 | Lindsley <i>et al.</i> , 2006    | Genes whose expression is Wnt dependent during ES cell differentiation. Extracted from Supplementary Table 1.                                                                      |
| ms6a         | 123              | 16926388 | Reece <i>et al.</i> , 2006       | Up-regulated genes in both WT and SCID mice by DPI. Extracted from Supplementary Table S2.                                                                                         |
| ms6b         | 220              | 16926388 | Reece <i>et al.</i> , 2006       | Genes that were differentially expressed in the lungs of WT and SCID mice at days 2, 4, and 12 post-Nippostrongylus brasiliensis infection. Extracted from Supplementary Table S3. |
| ms7a         | 1138             | 16926395 | He <i>et al.</i> , 2006          | Significantly down-regulated probesets at 4h post B. melitensis infection. Extracted from Supplementary Table 1.                                                                   |
| ms7b         | 288              | 16926395 | He <i>et al.</i> , 2006          | Significantly up-regulated probesets at 4h post B. melitensis infection. Extracted from Supplementary Table 2.                                                                     |
| ms8          | 1528             | 16772024 | Korostynski <i>et al.</i> , 2006 | Probesets differentially expressed among the four inbred strains of mice. Extracted from Supplementary Table S2.                                                                   |
| ms9a         | 75               | 16945109 | Heinitz <i>et al.</i> , 2006     | Differentially expressed genes in differentiated SN56.B5.G4 cells after treatment with Abeta(1-42). Extracted from Table 1 in the original paper.                                  |
| ms9b         | 14               | 16945109 | Heinitz <i>et al.</i> , 2006     | Differentially expressed genes in differentiated SN56.B5.G4 cells after treatment with H2O2. Extracted from Table 2 in the original paper                                          |
| ms9c         | 15               | 16945109 | Heinitz <i>et al.</i> , 2006     | Differentially expressed genes in differentiated SN56.B5.G4 cells after treatment with Abeta(1-42) and H2O2. Extracted from Table 3 in the original paper                          |
| ms10a        | 36               | 16105979 | Kawagoe <i>et al.</i> , 2005     | Genes up-regulated (>5-fold) in MN1-TEL+/HOXA9+ AML cells in mice. Extracted from Supplementary Table S1.                                                                          |
| ms10b        | 32               | 16105979 | Kawagoe <i>et al.</i> , 2005     | Genes down-regulated (>5-fold) in MN1-TEL+/HOXA9+ AML cells in mice. Extracted from Supplementary Table S2.                                                                        |

## Details of literature gene lists (continued)

### Mouse 430 2.0

| Gene list ID | Probesets number | PMID     | Source                            | Description                                                                                                                                          |
|--------------|------------------|----------|-----------------------------------|------------------------------------------------------------------------------------------------------------------------------------------------------|
| ms11a        | 388              | 17227850 | Jankovic <i>et al.</i> , 2007     | CMP-associated transcript. Extracted from Supplementary Dataset 1.                                                                                   |
| ms11b        | 2038             | 17227850 | Jankovic <i>et al.</i> , 2007     | HSC-associated transcript. Extracted from Supplementary Dataset 2.                                                                                   |
| ms12a        | 1674             | 17183314 | Niedernhofer <i>et al.</i> , 2006 | Genes differentially expressed in <i>Ercc1</i> <sup>-/-</sup> compared with wild-type liver. Extracted from Supplementary Table III.                 |
| ms12b        | 1665             | 17183314 | Niedernhofer <i>et al.</i> , 2006 | Genes differentially expressed in aged (130-wk-old) wt mouse liver compared to young (2-mo-old) controls. Extracted from Supplementary Table V.      |
| ms12c        | 1773             | 17183314 | Niedernhofer <i>et al.</i> , 2006 | Genes differentially expressed in adult (4-mo-old) wt mouse livers compared to young (2-mo-old) controls. Extracted from Supplementary Table VI.     |
| ms13a        | 595              | 15967997 | Rossi <i>et al.</i> , 2005        | Age-up-regulated genes in LT-HSC. Extracted from Supplementary Table 4.                                                                              |
| ms13b        | 383              | 15967997 | Rossi <i>et al.</i> , 2005        | Age-down-regulated genes in LT-HSC. Extracted from Supplementary Table 4.                                                                            |
| ms14a        | 252              | 16110338 | Corbo <i>et al.</i> , 2005        | Genes up-regulated in rd7 mutant retina at P21. Extracted from Supplementary Table S4.                                                               |
| ms14b        | 138              | 16110338 | Corbo <i>et al.</i> , 2005        | Genes down-regulated in rd7 mutant retina at P21. Extracted from Supplementary Table S5.                                                             |
| ms15a        | 767              | 16373508 | Shiina <i>et al.</i> , 2005       | Down-regulated genes in 8-week-old <i>AR</i> <sup>-/-</sup> ovaries. Extracted from Supplementary Table 1.                                           |
| ms15b        | 346              | 16373508 | Shiina <i>et al.</i> , 2005       | Up-regulated genes in 8-week-old <i>AR</i> <sup>-/-</sup> ovaries. Extracted from Supplementary Table 2.                                             |
| ms15c        | 323              | 16373508 | Shiina <i>et al.</i> , 2005       | Down-regulated genes in 3-week-old <i>AR</i> <sup>-/-</sup> ovaries. Extracted from Supplementary Table 3.                                           |
| ms15d        | 516              | 16373508 | Shiina <i>et al.</i> , 2005       | Up-regulated genes in 3-week-old <i>AR</i> <sup>-/-</sup> ovaries. Extracted from Supplementary Table 4.                                             |
| ms16a        | 266              | 16399799 | Beverdam <i>et al.</i> , 2006     | Genes specifically up-regulated in 11.5 dpc male somatic cells. Extracted from Supplementary Table S1.                                               |
| ms16b        | 50               | 16399799 | Beverdam <i>et al.</i> , 2006     | Genes specifically down-regulated in 11.5 dpc male somatic gonad cells. Extracted from Supplementary Table S3.                                       |
| ms16c        | 243              | 16399799 | Beverdam <i>et al.</i> , 2006     | Genes specifically up-regulated in 11.5 dpc female somatic cells. Extracted from Supplementary Table S5.                                             |
| ms17a        | 509              | 16166195 | Denolet <i>et al.</i> , 2005      | Transcripts down-regulated in SCARKO as compared to control mice at day 10. Extracted from Supplementary Table 1.                                    |
| ms17b        | 342              | 16166195 | Denolet <i>et al.</i> , 2005      | Transcripts up-regulated in SCARKO as compared to control mice at day 10. Extracted from Supplementary Table 1.                                      |
| ms18         | 492              | 16423883 | Jeong <i>et al.</i> , 2006        | Genes differentially expressed in the liver of <i>SRC-2</i> <sup>-/-</sup> mice as compared to wild type mice. Extracted from Supplementary Table 2. |
| ms19         | 429              | 16641092 | Costinean <i>et al.</i> , 2006    | Genes differentially expressed in transgenic relative to wild-type mice. Extracted from Supplementary Table 3.                                       |
| ms20         | 248              | 16847333 | Sun <i>et al.</i> , 2006          | Genes differentially expressed in day 5 postpartum <i>Mkl1</i> KO versus wild type mammary glands. Extracted from Supplementary Table S1.            |



Details of literature gene lists (continued)

Rat 230 2.0

| Gene list ID | Probesets number | PMID     | Source                            | Description                                                                                                                            |
|--------------|------------------|----------|-----------------------------------|----------------------------------------------------------------------------------------------------------------------------------------|
| rat1a        | 1215             | 16854511 | Mainwaring <i>et al.</i> , 2006   | Genes with altered expression post paraquat dosing compared to control lung. Extracted from Supplementary Table 2.                     |
| rat1b        | 543              | 16854511 | Mainwaring <i>et al.</i> , 2006   | This is a subset of genes in rat1a, selected based on a more stringent statistical test. Extracted from Supplementary Table 3.         |
| rat2         | 95               | 16770850 | Bardag-Gorce <i>et al.</i> , 2006 | Differentially expressed genes between the peaks of UAL (group 3) and controls (group 1). Extracted from Table 2 in the main paper.    |
| rat3         | 257              | 16574311 | Chen <i>et al.</i> , 2006         | Genes regulated by PPAR $\gamma$ in RIE cells. Extracted from Supplementary data.                                                      |
| rat4a        | 22               | 16202214 | Jaster <i>et al.</i> , 2005       | Genes up-regulated in PPAR $\gamma$ 1-overexpressing LTC cells. Extracted from Table 1A in the main paper.                             |
| rat4b        | 19               | 16202214 | Jaster <i>et al.</i> , 2005       | Genes down-regulated in PPAR $\gamma$ 1-overexpressing LTC cells. Extracted from Table 1B in the main paper.                           |
| rat5a        | 18               | 16715494 | Ko <i>et al.</i> , 2006           | Genes up-regulated by haloperidol and clozapine. Extracted from Table IA in the main paper.                                            |
| rat5b        | 14               | 16715494 | Ko <i>et al.</i> , 2006           | Genes down-regulated by haloperidol and clozapine. Extracted from Table IB in the main paper.                                          |
| rat5c        | 17               | 16715494 | Ko <i>et al.</i> , 2006           | Genes up-regulated by amphetamine. Extracted from Table IIA in the main paper.                                                         |
| rat5d        | 5                | 16715494 | Ko <i>et al.</i> , 2006           | Genes down-regulated by amphetamine. Extracted from Table IIB in the main paper.                                                       |
| rat5e        | 15               | 16715494 | Ko <i>et al.</i> , 2006           | Genes up-regulated by amphetamine, but down-regulated by haloperidol and clozapine. Extracted from Table IIIA in the main paper.       |
| rat5f        | 6                | 16715494 | Ko <i>et al.</i> , 2006           | Genes down-regulated by amphetamine, but up-regulated by haloperidol and clozapine. Extracted from Table IIIB in the main paper.       |
| rat5g        | 23               | 16715494 | Ko <i>et al.</i> , 2006           | Genes up-regulated by haloperidol, clozapine, and amphetamine. Extracted from Table IVA in the main paper.                             |
| rat5h        | 12               | 16715494 | Ko <i>et al.</i> , 2006           | Genes down-regulated by haloperidol, clozapine, and amphetamine. Extracted from Table IVB in the main paper.                           |
| rat6a        | 1777             | 16809437 | Lahousse <i>et al.</i> , 2006     | Genes that displayed a significant expression change within 12h of MEHP exposure. Extracted from Supplementary Table 1.                |
| rat6b        | 536              | 16809437 | Lahousse <i>et al.</i> , 2006     | Genes altered significantly at 1, 3, 6, or 12h following fetal DBP exposure. Extracted from Supplementary Table 2.                     |
| rat6c        | 176              | 16809437 | Lahousse <i>et al.</i> , 2006     | Genes showed altered expression at fetal and prepubertal ages. Extracted from Supplementary Table 3.                                   |
| rat7a        | 2410             | 17082646 | Geoffrey <i>et al.</i> , 2006     | Genes over-represented in DRlyp/lyp. Extracted from Supplementary Table A.                                                             |
| rat7b        | 2660             | 17082646 | Geoffrey <i>et al.</i> , 2006     | Gene over-represented in DR+/+ . Extracted from Supplementary Table B.                                                                 |
| rat8a        | 315              | 16401727 | Luyendyk <i>et al.</i> , 2006     | Genes differentially expressed in LPS/Veh/RAN-treated rats relative to LPS/Veh/FAM-treated rats. Extracted from Supplementary Table 1. |
| rat8b        | 145              | 16401727 | Luyendyk <i>et al.</i> , 2006     | Heparin-responsive probesets in LPS/RAN-treated rats. Extracted from Supplementary Table 2.                                            |

## Details of literature gene lists (continued)

### Rat 230 2.0

| Gene list ID | Probesets number | PMID     | Source                        | Description                                                                                                                                                            |
|--------------|------------------|----------|-------------------------------|------------------------------------------------------------------------------------------------------------------------------------------------------------------------|
| rat8c        | 29               | 16401727 | Luyendyk <i>et al.</i> , 2006 | Subset AB: Genes differentially expressed in LPS/Veh/RAN-treated rats relative to LPS/Veh/FAM-treated rats, and also by heparin. Extracted from Supplementary Table 3. |
| rat9a        | 113              | 17069981 | Coyle <i>et al.</i> , 2007    | Genes up-regulated in Allodynic animals. Extracted from Supplementary Table 3.                                                                                         |
| rat9b        | 20               | 17069981 | Coyle <i>et al.</i> , 2007    | Genes down-regulated in Allodynic animals. Extracted from Supplementary Table 3.                                                                                       |
| rat10        | 30               | 17187413 | Yovchev <i>et al.</i> , 2007  | Genes up-regulated in the oval cell enriched fractions. Extracted from Table 1 in the main paper.                                                                      |
| rat11a       | 436              | 17332525 | Xia <i>et al.</i> , 2007      | Transcripts with >2-fold changes in their expression by day 4 after Adjudin treatment. Extracted from Supplementary Table 1.                                           |
| rat11b       | 1466             | 17332525 | Xia <i>et al.</i> , 2007      | Transcripts that were significantly altered following Adjudin treatment ( $P < 0.05$ by ANOVA). Extracted from Supplementary Table 2.                                  |

Details of literature gene lists (continued)

| Arabidopsis ATH1 |                  |          |                                |                                                                                                                                                                        |
|------------------|------------------|----------|--------------------------------|------------------------------------------------------------------------------------------------------------------------------------------------------------------------|
| Gene list ID     | Probesets number | PMID     | Source                         | Description                                                                                                                                                            |
| ath1             | 685              | 12920300 | Nishimura <i>et al.</i> , 2003 | Genes response to pathogen attack. Extracted from Supplementary Table S2.                                                                                              |
| ath2a            | 3110             | 16243906 | Vanneste <i>et al.</i> , 2005  | Differentially expressed genes in the wild type versus the slr1 mutant (denoted as the 3110 significant genes in the main text). Extracted from Supplementary Table 1. |
| ath2b            | 913              | 16243906 | Vanneste <i>et al.</i> , 2005  | Lateral root initiation genes (denoted as the 913 LRI genes in the main text). Extracted from Supplementary Table 2.                                                   |
| ath2c            | 99               | 16243906 | Vanneste <i>et al.</i> , 2005  | LRI Genes with arf7 arf19–Dependent Auxin Inducibility. Extracted from Supplementary Table 6.                                                                          |
| ath3a            | 222              | 16299223 | Bläsing <i>et al.</i> , 2005   | 3h Glucose-repressed genes. Extracted from Supplementary Table 6.                                                                                                      |
| ath3b            | 218              | 16299223 | Bläsing <i>et al.</i> , 2005   | 3h Glucose-induced genes. Extracted from Supplementary Table 6.                                                                                                        |
| ath3c            | 223              | 16299223 | Bläsing <i>et al.</i> , 2005   | 3h Sucrose-repressed genes. Extracted from Supplementary Table 6.                                                                                                      |
| ath3d            | 224              | 16299223 | Bläsing <i>et al.</i> , 2005   | 3h Sucrose-induced genes. Extracted from Supplementary Table 6.                                                                                                        |
| ath3e            | 223              | 16299223 | Bläsing <i>et al.</i> , 2005   | 4h Photomorphogenesis repressed genes. Extracted from Supplementary Table 6.                                                                                           |
| ath3f            | 219              | 16299223 | Bläsing <i>et al.</i> , 2005   | 4h Photomorphogenesis induced genes. Extracted from Supplementary Table 6.                                                                                             |
| ath3g            | 220              | 16299223 | Bläsing <i>et al.</i> , 2005   | 30min NO3 repressed genes. Extracted from Supplementary Table 6.                                                                                                       |
| ath3h            | 219              | 16299223 | Bläsing <i>et al.</i> , 2005   | 30min NO3 induced genes. Extracted from Supplementary Table 6.                                                                                                         |
| ath3i            | 235              | 16299223 | Bläsing <i>et al.</i> , 2005   | 3h NO3 repressed genes. Extracted from Supplementary Table 6.                                                                                                          |
| ath3j            | 209              | 16299223 | Bläsing <i>et al.</i> , 2005   | 3h NO3 induced genes. Extracted from Supplementary Table 6.                                                                                                            |
| ath3k            | 217              | 16299223 | Bläsing <i>et al.</i> , 2005   | 3h Mannitol repressed genes. Extracted from Supplementary Table 6.                                                                                                     |
| ath3l            | 228              | 16299223 | Bläsing <i>et al.</i> , 2005   | 3h Mannitol induced genes. Extracted from Supplementary Table 6.                                                                                                       |
| ath3m            | 232              | 16299223 | Bläsing <i>et al.</i> , 2005   | 4h Carbon fixation repressed genes. Extracted from Supplementary Table 6.                                                                                              |
| ath3n            | 218              | 16299223 | Bläsing <i>et al.</i> , 2005   | 4h Carbon fixation induced genes. Extracted from Supplementary Table 6.                                                                                                |
| ath3o            | 221              | 16299223 | Bläsing <i>et al.</i> , 2005   | 4h light repressed genes. Extracted from Supplementary Table 6.                                                                                                        |
| ath3p            | 228              | 16299223 | Bläsing <i>et al.</i> , 2005   | 4h light induced genes. Extracted from Supplementary Table 6.                                                                                                          |
| ath3q            | 643              | 16299223 | Bläsing <i>et al.</i> , 2005   | Genes responsive to carbon fixation and glucose. Extracted from Supplementary Table 8.                                                                                 |
| ath4a            | 189              | 17006513 | Mouchel <i>et al.</i> , 2006   | Gene regulated due to residual Uk-1 loci other than brx. Extracted from Supplementary Table 1: root introgression drag bg.                                             |
| ath4b            | 4006             | 17006513 | Mouchel <i>et al.</i> , 2006   | Genes strongly regulated in root of brx. Extracted from Supplementary Table 1: >2x, brx vs. Sav+resc., root.                                                           |

## Details of literature gene lists (continued)

| Arabidopsis ATH1 |                  |          |                                |                                                                                                                                                    |
|------------------|------------------|----------|--------------------------------|----------------------------------------------------------------------------------------------------------------------------------------------------|
| Gene list ID     | Probesets number | PMID     | Source                         | Description                                                                                                                                        |
| ath4c            | 3072             | 17006513 | Mouchel <i>et al.</i> , 2006   | Up-regulated genes in root and seedling of brx relative to Sav-0. Extracted from Supplementary Table 1: >2x, vs. Sav+resc., root+seedling.         |
| ath4d            | 26               | 17006513 | Mouchel <i>et al.</i> , 2006   | Genes not rescued by BL treatment. Extracted from Supplementary Table 1.                                                                           |
| ath5a            | 19               | 16805732 | Mandaokar <i>et al.</i> , 2006 | Jasmonate-responsive genes in stamens at 0.5h. Extracted from Supplementary Table S1.                                                              |
| ath5b            | 198              | 16805732 | Mandaokar <i>et al.</i> , 2006 | Jasmonate-responsive genes in stamens at 2h. Extracted from Supplementary Table S1.                                                                |
| ath5c            | 491              | 16805732 | Mandaokar <i>et al.</i> , 2006 | Jasmonate-responsive genes in stamens at 8h. Extracted from Supplementary Table S1.                                                                |
| ath5d            | 811              | 16805732 | Mandaokar <i>et al.</i> , 2006 | Jasmonate-responsive genes in stamens at 22h. Extracted from Supplementary Table S1.                                                               |
| ath6a            | 911              | 16107481 | Nagpal <i>et al.</i> , 2005    | Genes whose expression changes during development and peaks at stages 13-14. Extracted from Supplementary Table S1.                                |
| ath6b            | 417              | 16107481 | Nagpal <i>et al.</i> , 2005    | Genes whose expression changes during development and peaks at stages 11-12. Extracted from Supplementary Table S1.                                |
| ath6c            | 387              | 16107481 | Nagpal <i>et al.</i> , 2005    | Genes whose expression changes during development and peaks pre-stage 11. Extracted from Supplementary Table S1.                                   |
| ath6d            | 79               | 16107481 | Nagpal <i>et al.</i> , 2005    | Genes whose expression in stage 1-10 flowers is greater in Columbia flowers than in the arf6 arf8 flowers. Extracted from Supplementary Table S2.  |
| ath6e            | 472              | 16107481 | Nagpal <i>et al.</i> , 2005    | Genes whose expression in stage 11-12 flowers is greater in Columbia flowers than in the arf6 arf8 flowers. Extracted from Supplementary Table S2. |
| ath6f            | 692              | 16107481 | Nagpal <i>et al.</i> , 2005    | Genes whose expression in stage 13-14 flowers is greater in Columbia flowers than in the arf6 arf8 flowers. Extracted from Supplementary Table S2. |
| ath6g            | 35               | 16107481 | Nagpal <i>et al.</i> , 2005    | Genes induced by auxin-treatment. Extracted from Supplementary Table S3.                                                                           |
| ath7a            | 1592             | 15908603 | Tatematsu <i>et al.</i> , 2005 | Down-regulated genes in axillary bud. Extracted from Supplementary Table 1b.                                                                       |
| ath7b            | 1184             | 15908603 | Tatematsu <i>et al.</i> , 2005 | Up-regulated gene in axillary bud. Extracted from Supplementary Table 1c.                                                                          |
| ath7c            | 272              | 15908603 | Tatematsu <i>et al.</i> , 2005 | SRE-containing down-regulated genes in axillary bud. From Supplementary Table 2a.                                                                  |
| ath7d            | 162              | 15908603 | Tatematsu <i>et al.</i> , 2005 | Up1-containing up-regulated genes in axillary bud. From Supplementary Table 2b.                                                                    |
| ath7e            | 193              | 15908603 | Tatematsu <i>et al.</i> , 2005 | Up2-containing up-regulated genes in axillary bud. From Supplementary Table 2c.                                                                    |
| ath8a            | 115              | 15894741 | Tung <i>et al.</i> , 2005      | Genes regulated in the stigmas relative to wild-type stigmas. Extracted from Supplementary Table 1.                                                |
| ath8b            | 33               | 15894741 | Tung <i>et al.</i> , 2005      | Genes regulated in ablated ovary samples. Extracted from Supplementary Table 2.                                                                    |
| ath9             | 547              | 15937231 | Sibout <i>et al.</i> , 2005    | Genes with altered expression in the double mutant. Extracted from Supplementary Table 10.                                                         |
| ath10a           | 104              | 16021403 | Zhang <i>et al.</i> , 2005     | Genes preferentially expressed in young inflorescences. Extracted from Supplementary Table 6.                                                      |

Details of literature gene lists (continued)

| Arabidopsis ATH1 |                  |          |                                |                                                                                                                                                                                      |
|------------------|------------------|----------|--------------------------------|--------------------------------------------------------------------------------------------------------------------------------------------------------------------------------------|
| Gene list ID     | Probesets number | PMID     | Source                         | Description                                                                                                                                                                          |
| ath10b           | 105              | 16021403 | Zhang <i>et al.</i> , 2005     | Genes preferentially expressed in all three reproductive organs (i.e. the young inflorescences, stage-12 floral buds and developing siliques). Extracted from Supplementary Table 7. |
| ath10c           | 82               | 16021403 | Zhang <i>et al.</i> , 2005     | Genes preferentially expressed in young inflorescences and stage 12 floral buds. Extracted from Supplementary Table 8.                                                               |
| ath10d           | 92               | 16021403 | Zhang <i>et al.</i> , 2005     | Genes preferentially expressed in stage 12 floral buds and silique. Extracted from Supplementary Table 9.                                                                            |
| ath11a           | 614              | 16299169 | Suh <i>et al.</i> , 2005       | Genes up-regulated in the epidermis of the base of the stem AND the epidermis of the top of the stem. Extracted from Supplementary Data: Up regulated top and base epid.             |
| ath11b           | 630              | 16299169 | Suh <i>et al.</i> , 2005       | Genes up-regulated in the epidermis of the top of the stem only. Extracted from Supplementary Data: Up-regulated top epidermis only.                                                 |
| ath11c           | 657              | 16299169 | Suh <i>et al.</i> , 2005       | Genes found to be up regulated in the epidermis of the base of the stem only. Extracted from Supplementary Data: Up-regulated base epidermis only.                                   |
| ath12            | 718              | 16492731 | Braybrook <i>et al.</i> , 2006 | Genes induced by LEC2. Extracted from Supplementary Table 2.                                                                                                                         |
| ath13            | 1122             | 16299182 | Lin <i>et al.</i> , 2005       | Differentially expressed genes under At5PTase13 deficiency. Extracted from Supplementary Table 1.                                                                                    |
| ath14            | 203              | 16299171 | Umbach <i>et al.</i> , 2005    | Genes differentially expressed in antisense versus wild-type leaves. Extracted from Supplementary Table II.                                                                          |
| ath15            | 72               | 16330762 | Brown <i>et al.</i> , 2005     | Genes induced by UV-B in wild type but show much reduced UV-B induction in <i>uvr8-1</i> mutant. Extracted from Supplementary Table 2.                                               |
| ath16a           | 104              | 16372013 | Leibfried <i>et al.</i> , 2005 | Genes up-regulated by WUS but not to STM or LFY induction. Extracted from Supplementary Table S1.                                                                                    |
| ath16b           | 44               | 16372013 | Leibfried <i>et al.</i> , 2005 | Genes down-regulated by WUS but not to STM or LFY induction. Extracted from Supplementary Table S1.                                                                                  |
| ath17a           | 668              | 16183833 | Davletova <i>et al.</i> , 2005 | Transcripts significantly elevated/suppressed (>2-fold) in wild type plants following treatment with hydrogen peroxide. Extracted from Supplementary Table 2.                        |
| ath17b           | 8                | 16183833 | Davletova <i>et al.</i> , 2005 | Transcripts significantly enhanced in <i>Zat12</i> over-expressing plants more than in WT plant. Extracted from Supplementary Table 3.                                               |
| ath17c           | 90               | 16183833 | Davletova <i>et al.</i> , 2005 | Transcripts significantly enhanced (>2-fold) in <i>Zat12</i> over-expressing plants in response to hydrogen peroxide. Extracted from Supplementary Table 4.                          |
| ath17d           | 637              | 16183833 | Davletova <i>et al.</i> , 2005 | All transcripts significantly elevated in <i>Zat12</i> -overexpressing plants in response to H <sub>2</sub> O <sub>2</sub> stress. Extracted from Supplementary Table 5.             |
| ath18            | 44               | 16648214 | Kolbe <i>et al.</i> , 2006     | Genes responsive to short-term DTT treatment. Extracted from Supplementary Table S2.                                                                                                 |
| ath19a           | 64               | 15608331 | Yang <i>et al.</i> , 2005      | Genes down-regulated by MSBP1. Extracted from Supplementary Table 1.                                                                                                                 |
| ath19b           | 116              | 15608331 | Yang <i>et al.</i> , 2005      | Genes up-regulated by MSBP1. Extracted from Supplementary Table 1.                                                                                                                   |
| ath20a           | 579              | 15505214 | Monte <i>et al.</i> , 2004     | Genes response to 1-h continuous red light (Rc) in wild-type (WT) Arabidopsis seedlings. Extracted from Supplementary Table 3.                                                       |

**Details of literature gene lists (continued)**

**Arabidopsis ATH1**

| <b>Gene list ID</b> | <b>Probesets number</b> | <b>PMID</b> | <b>Source</b>              | <b>Description</b>                                                                   |
|---------------------|-------------------------|-------------|----------------------------|--------------------------------------------------------------------------------------|
| ath20b              | 370                     | 15505214    | Monte <i>et al.</i> , 2004 | Genes that were induced in the WT by 1-h Rc. Extracted from Supplementary Table 4    |
| ath20c              | 210                     | 15505214    | Monte <i>et al.</i> , 2004 | Genes that were repressed in the WT by 1-h Rc. Extracted from Supplementary Table 5. |

## Details of literature gene lists (continued)

| DrosGenome1  |                  |          |                                 |                                                                                                                                                                                                                          |
|--------------|------------------|----------|---------------------------------|--------------------------------------------------------------------------------------------------------------------------------------------------------------------------------------------------------------------------|
| Gene list ID | Probesets number | PMID     | Source                          | Description                                                                                                                                                                                                              |
| dros1        | 159              | 16277749 | Wertheim <i>et al.</i> , 2005   | Probesets differentially expressed between parasitised and control larvae. Extracted from Additional data file 1.                                                                                                        |
| dros2        | 1456             | 15345053 | Wang <i>et al.</i> , 2004       | Genes up-regulated in tubule. Extracted from Additional data file 1.                                                                                                                                                     |
| dros3a       | 150              | 15777795 | Johansson <i>et al.</i> , 2005  | Genes induced in <i>Drosophila mbn-2</i> cells 6 h post-challenge with crude LPS. Extracted from Supplementary Table 2.                                                                                                  |
| dros3b       | 518              | 15777795 | Johansson <i>et al.</i> , 2005  | Differentially expressed genes in <i>Drosophila mbn-2</i> cells 6 h post-challenge with crude LPS or <i>E. coli</i> . Extracted from Supplementary Table 3.                                                              |
| dros4a       | 272              | 16357214 | Goodliffe <i>et al.</i> , 2005  | Genes up-regulated in response to Myc. Extracted from Supplementary data 1                                                                                                                                               |
| dros4b       | 214              | 16357214 | Goodliffe <i>et al.</i> , 2005  | Genes were elevated upon reduction of Pc. Extracted from Supplementary data 2                                                                                                                                            |
| dros4c       | 129              | 16357214 | Goodliffe <i>et al.</i> , 2005  | Genes that were repressed by a factor of 0.533 or more by the ectopic accumulation of dMyc. Extracted from Supplementary data 3.                                                                                         |
| dros5        | 51               | 12777520 | Michalak <i>et al.</i> , 2003   | Transcripts differed significantly in F1 hybrids from both <i>D. simulans</i> and <i>D. mauritiana</i> . Extracted from Supplementary Table 1.                                                                           |
| dros6a       | 4188             | 16356271 | Beckstead <i>et al.</i> , 2005  | Genes that change their expression $\geq 1.5$ -fold in at least one time point in <i>EcRi</i> animals. Extracted from Additional data file 1.                                                                            |
| dros6b       | 743              | 16356271 | Beckstead <i>et al.</i> , 2005  | 20E-regulated and 20E primary-response genes. Extracted from Additional data file 2.                                                                                                                                     |
| dros7        | 286              | 16264191 | Badenhorst <i>et al.</i> , 2005 | Genes differentially expressed in Nurf301 mutants compared with wild-type larvae. The Supplementary data was downloaded from <a href="http://home.ccr.cancer.gov/badenhorst">http://home.ccr.cancer.gov/badenhorst</a> . |
| dros8a       | 1286             | 12586708 | Asha <i>et al.</i> , 2003       | Genes that are up-regulated in Ras-act hemocytes. Extracted from Supplementary Table 1.                                                                                                                                  |
| dros8b       | 260              | 12586708 | Asha <i>et al.</i> , 2003       | Genes that are down-regulated in Ras-act hemocytes. Extracted from Supplementary Table 2.                                                                                                                                |
| dros9        | 403              | 16616121 | Terry <i>et al.</i> , 2006      | Candidate stem cell genes: genes enriched in Os+ bgcn- compared to bgcn-. Extracted from Supplementary Table 1.                                                                                                          |
| dros10a      | 34               | 16333985 | Sørensen <i>et al.</i> , 2005   | Genes early up-regulated by stress. Extracted from Table 3A in the original paper.                                                                                                                                       |
| dros10b      | 123              | 16333985 | Sørensen <i>et al.</i> , 2005   | Genes early down-regulated by stress. Extracted from Table 3B in the original paper.                                                                                                                                     |
| dros10c      | 34               | 16333985 | Sørensen <i>et al.</i> , 2005   | Genes late up-regulated by stress. Extracted from Table 3C in the original paper.                                                                                                                                        |
| dros11a      | 2308             | 16204451 | Yang <i>et al.</i> , 2005       | Genes under-represented in fly photoreceptor cells relative to whole head. Extracted from Supplementary Table 1.                                                                                                         |
| dros11b      | 1499             | 16204451 | Yang <i>et al.</i> , 2005       | Genes enriched in fly photoreceptor cells relative to whole head. Extracted from Supplementary Table 2.                                                                                                                  |
| dros12a      | 4503             | 16584578 | Girardot <i>et al.</i> , 2006   | Genes that showed age-dependent expression in body parts. Extracted from Additional file 1.                                                                                                                              |
| dros12b      | 126              | 16584578 | Girardot <i>et al.</i> , 2006   | Most head- or thorax-enriched genes. Extracted from Additional file 2.                                                                                                                                                   |

## Details of literature gene lists (continued)

| DrosGenome1  |                  |          |                                         |                                                                                                                                                                                   |
|--------------|------------------|----------|-----------------------------------------|-----------------------------------------------------------------------------------------------------------------------------------------------------------------------------------|
| Gene list ID | Probesets number | PMID     | Source                                  | Description                                                                                                                                                                       |
| dros12c      | 112              | 16584578 | Girardot <i>et al.</i> , 2006           | Common age-responsive genes. Extracted from Additional file 4.                                                                                                                    |
| dros13       | 539              | 16798875 | Mack <i>et al.</i> , 2006               | Genes whose expression levels differed significantly in the reproductive tract of unmated vs. mated females at 0, 3, 6, or 24 h postmating. Extracted from Supplementary Table 3. |
| dros14a      | 168              | 15136717 | Landis <i>et al.</i> , 2004             | Genes up-regulated with age. Extracted from Supplementary Table 1: old up.                                                                                                        |
| dros14b      | 494              | 15136717 | Landis <i>et al.</i> , 2004             | Genes down-regulated with age. Extracted from Supplementary Table 1: old down.                                                                                                    |
| dros14c      | 108              | 15136717 | Landis <i>et al.</i> , 2004             | Genes up-regulated with oxidative stress. Extracted from Supplementary Table 1: O2 up.                                                                                            |
| dros14d      | 234              | 15136717 | Landis <i>et al.</i> , 2004             | Genes down-regulated with oxidative stress. Extracted from Supplementary Table 1: O2 down                                                                                         |
| dros14e      | 97               | 15136717 | Landis <i>et al.</i> , 2004             | Genes up-regulated with age and oxidative stress. Extracted from Supplementary Table 1: old O2 up                                                                                 |
| dros14f      | 154              | 15136717 | Landis <i>et al.</i> , 2004             | Genes down-regulated with age and oxidative stress. Extracted from Supplementary Table 1: old O2 down                                                                             |
| dros14g      | 8                | 15136717 | Landis <i>et al.</i> , 2004             | Genes down-regulated with age but up-regulated with oxidative stress. Extracted from Supplementary Table 1: old down O2 up                                                        |
| dros14h      | 6                | 15136717 | Landis <i>et al.</i> , 2004             | Genes up-regulated with age but down-regulated with oxidative stress. Extracted from Supplementary Table 1: old up O2 down                                                        |
| dros15       | 353              | 16754642 | Osada <i>et al.</i> , 2006              | Probesets differentially expressed in MMM and ZZZ. Extracted from Supplementary Table 1.                                                                                          |
| dros16       | 321              | 15090076 | Loop <i>et al.</i> , 2004               | Genes differentially expressed between brat/k06028 and wild type control. Extracted from Additional file 3.                                                                       |
| dros17a      | 552              | 16938865 | Kadener <i>et al.</i> , 2006            | Genes down-regulated in TIM-MJD fly heads. Extracted from Supporting Table 5.                                                                                                     |
| dros17b      | 368              | 16938865 | Kadener <i>et al.</i> , 2006            | Genes up-regulated in TIM-MJD fly heads. Extracted from Supporting Table 6.                                                                                                       |
| dros17c      | 597              | 16938865 | Kadener <i>et al.</i> , 2006            | Genes down-regulated in TIM-MJD fly brains. Extracted from Supporting Table 7.                                                                                                    |
| dros17d      | 739              | 16938865 | Kadener <i>et al.</i> , 2006            | Genes up-regulated in TIM-MJD fly brains. Extracted from Supporting Table 8.                                                                                                      |
| dros18       | 427              | 14749722 | Roxström-Lindquist <i>et al.</i> , 2004 | Genes that were significantly up-regulated following infection with virus, bacteria or fungi in parallel. Extracted from Supplementary Table 2.                                   |
| dros19a      | 133              | 15695583 | Apidianakis <i>et al.</i> , 2005        | Genes up-regulated by <i>P. aeruginosa</i> strain CF5. Extracted from Supplementary Table 1.                                                                                      |
| dros19b      | 80               | 15695583 | Apidianakis <i>et al.</i> , 2005        | Genes down-regulated by <i>P. aeruginosa</i> strain CF5. Extracted from Supplementary Table 1.                                                                                    |
| dros19c      | 16               | 15695583 | Apidianakis <i>et al.</i> , 2005        | Genes up-regulated by <i>P. aeruginosa</i> strain PA14. Extracted from Supplementary Table 2.                                                                                     |
| dros19d      | 12               | 15695583 | Apidianakis <i>et al.</i> , 2005        | Genes down-regulated by <i>P. aeruginosa</i> strain PA14. Extracted from Supplementary Table 2.                                                                                   |
| dros19e      | 241              | 15695583 | Apidianakis <i>et al.</i> , 2005        | Genes differentially expressed in CF5-infected vs. PA14-infected flies. Extracted from Supplementary Table 3.                                                                     |
| dros20       | 1368             | 15458575 | Girardot <i>et al.</i> , 2004           | Stress responsive genes. Extracted from Supplementary Table S1.                                                                                                                   |



## Details of literature gene lists (continued)

| <b>Drosophila 2.0</b> |                         |             |                                |                                                                                                                                                                                                              |
|-----------------------|-------------------------|-------------|--------------------------------|--------------------------------------------------------------------------------------------------------------------------------------------------------------------------------------------------------------|
| <b>Gene list ID</b>   | <b>Probesets number</b> | <b>PMID</b> | <b>Source</b>                  | <b>Description</b>                                                                                                                                                                                           |
| dm1                   | 3727                    | 15851659    | Mackay <i>et al.</i> , 2005    | Genes differentially expressed between fast and slow selection lines. Extracted from Supplementary Table 5.                                                                                                  |
| dm2a                  | 16                      | 16269142    | Barmina <i>et al.</i> , 2005   | Genes differentially expressed between Male T1-Male T2. Extracted from Supplementary Table 1.                                                                                                                |
| dm2b                  | 23                      | 16269142    | Barmina <i>et al.</i> , 2005   | Genes differentially expressed between Female T1-Female T2. Extracted from Supplementary Table 2.                                                                                                            |
| dm2c                  | 143                     | 16269142    | Barmina <i>et al.</i> , 2005   | Genes differentially expressed between Male T1-Female T1. Extracted from Supplementary Table 3.                                                                                                              |
| dm2d                  | 35                      | 16269142    | Barmina <i>et al.</i> , 2005   | Genes differentially expressed between Male T2-Female T2. Extracted from Supplementary Table 4.                                                                                                              |
| dm3a                  | 187                     | 16581772    | Rehwinkel <i>et al.</i> , 2006 | Genes regulated in PIWI and AUB knockdowns. Extracted from Supplementary Table I.                                                                                                                            |
| dm3b                  | 472                     | 16581772    | Rehwinkel <i>et al.</i> , 2006 | Genes at least 1.5-fold up- or down-regulated in cells depleted of Drosha. Extracted from Supplementary Table II.                                                                                            |
| dm3c                  | 1081                    | 16581772    | Rehwinkel <i>et al.</i> , 2006 | Genes regulated in AGO1-depleted cells. Extracted from Supplementary Table III.                                                                                                                              |
| dm3d                  | 372                     | 16581772    | Rehwinkel <i>et al.</i> , 2006 | Genes regulated in AGO2-depleted cells. Extracted from Supplementary Table IV.                                                                                                                               |
| dm3e                  | 137                     | 16581772    | Rehwinkel <i>et al.</i> , 2006 | Genes upregulated in cells depleted of Drosha and AGO1. Extracted from Supplementary Table VI.                                                                                                               |
| dm4                   | 33                      | 16907832    | Sun <i>et al.</i> , 2006       | Genes that were differentially expressed after a 24 h exposure to phenobarbital in the diet of third-instar larvae as compared with larvae reared on control diet. Extracted from Table 1 in the main paper. |
| dm5                   | 2329                    | 16624921    | Hughes <i>et al.</i> , 2006    | Genes that displayed significant variation among isogenic lines. Extracted from Supplementary Table S1.                                                                                                      |
| dm6a                  | 1593                    | 17044737    | Edwards <i>et al.</i> , 2006   | Probesets differing significantly for the main effect of selection line. Extracted from Supplementary Table S2.                                                                                              |
| dm6b                  | 1539                    | 17044737    | Edwards <i>et al.</i> , 2006   | Probesets that displayed significant differences in contrast statements. Extracted from Supplementary Table S3.                                                                                              |
| dm6c                  | 12                      | 17044737    | Edwards <i>et al.</i> , 2006   | Probesets that displayed sexually antagonistic expression. Extracted from Supplementary Table S4.                                                                                                            |
| dm7                   | 582                     | 17054780    | Morozova <i>et al.</i> , 2006  | Probesets differentially expressed following alcohol exposure. Extracted from Additional data file 2.                                                                                                        |
| dm8a                  | 127                     | 16258543    | Liu <i>et al.</i> , 2005       | Genes commonly affected in both males and females after depletion of HP1. Extracted from Supplementary Table 1.                                                                                              |
| dm8b                  | 203                     | 16258543    | Liu <i>et al.</i> , 2005       | Genes specifically affected in males after depletion of HP1. Extracted from Supplementary Table 2.                                                                                                           |
| dm8c                  | 119                     | 16258543    | Liu <i>et al.</i> , 2005       | Genes specifically affected in females after depletion of HP1. Extracted from Supplementary Table 3.                                                                                                         |

## Details of literature gene lists (continued)

### C. elegans

| Gene list ID | Probesets number | PMID     | Source                          | Description                                                                                                                                                                                             |
|--------------|------------------|----------|---------------------------------|---------------------------------------------------------------------------------------------------------------------------------------------------------------------------------------------------------|
| ce1a         | 433              | 16626960 | Vartiainen <i>et al.</i> , 2006 | Up-regulated genes in transgenic <i>C. elegans</i> over-expressing alpha-synuclein. Extracted from Supplementary Table S7.                                                                              |
| ce1b         | 67               | 16626960 | Vartiainen <i>et al.</i> , 2006 | Down-regulated genes in transgenic <i>C. elegans</i> over-expressing alpha-synuclein. Extracted from Supplementary Table S3.                                                                            |
| ce2a         | 167              | 16480708 | Wang <i>et al.</i> , 2006       | Genes up-regulated upon over-expression of both CeTwist and CeE/DA. Extracted from Supplementary data S1.                                                                                               |
| ce2b         | 34               | 16480708 | Wang <i>et al.</i> , 2006       | Genes down-regulated upon over-expression of both CeTwist and CeE/DA. Extracted from Supplementary data S2.                                                                                             |
| ce3          | 816              | 16184190 | Shen <i>et al.</i> , 2005       | Genes differentially regulated by ire-1 and xbp-1. Extracted from Supplementary Table S10.                                                                                                              |
| ce4a         | 1092             | 15256590 | Huffman <i>et al.</i> , 2004    | Genes that showed significant regulation by Cry5B. Extracted from Supplementary Table 2.                                                                                                                |
| ce4b         | 1083             | 15256590 | Huffman <i>et al.</i> , 2004    | Genes that showed significant regulation by cadmium. Extracted from Supplementary Table 3.                                                                                                              |
| ce5a         | 1348             | 15308663 | McElwee <i>et al.</i> , 2004    | Genes that were up-regulated in daf-2 compared with daf-16;daf-2. Extracted from Supplementary data <- Final gene lists.xls <- worksheet: Daf-2 final gene list.                                        |
| ce5b         | 926              | 15308663 | McElwee <i>et al.</i> , 2004    | Genes that were down-regulated in daf-2 compared with daf-16;daf-2. Extracted from Supplementary data <- Final gene lists.xls <- worksheet: Daf-2 final gene list.                                      |
| ce6a         | 71               | 16809667 | O'Rourke <i>et al.</i> , 2006   | Genes up-regulated following infection of <i>C. elegans</i> with <i>M. nematophilum</i> . Extracted from Supplementary data S1.                                                                         |
| ce6b         | 22               | 16809667 | O'Rourke <i>et al.</i> , 2006   | Genes down-regulated following infection of <i>C. elegans</i> with <i>M. nematophilum</i> . Extracted from Supplementary data S1.                                                                       |
| ce7a         | 144              | 17096597 | Troemel <i>et al.</i> , 2006    | Genes differentially expressed between daf-2 and daf-2;pmk-1. From Supplementary Table S2                                                                                                               |
| ce7b         | 449              | 17096597 | Troemel <i>et al.</i> , 2006    | Genes differentially expressed between exposure to <i>E. coli</i> strain OP50 and wild-type <i>P. aeruginosa</i> strain PA14. From Supplementary Table S4.                                              |
| ce7c         | 287              | 17096597 | Troemel <i>et al.</i> , 2006    | Genes differentially expressed between exposure to gacA mutant and wild-type <i>P. aeruginosa</i> strain PA14. From Supplementary Table S5.                                                             |
| ce8a         | 44               | 16962739 | Towers <i>et al.</i> , 2006     | Up-regulated genes in the two mutant alleles cx35 and cx18 as compared to the wild-type. From Supplementary Table 1.                                                                                    |
| ce8b         | 71               | 16962739 | Towers <i>et al.</i> , 2006     | Down-regulated genes in the two mutant alleles cx35 and cx18 as compared to the wild-type. From Supplementary Table 2.                                                                                  |
| ce8c         | 124              | 16962739 | Towers <i>et al.</i> , 2006     | Differentially expressed genes between wild-type and dys-1 mutant. These genes were selected based on transcript presence calls and a statistical confidence level of 0.05. From Supplementary Table 3. |
| ce9          | 466              | 17187676 | Chen <i>et al.</i> , 2006       | Genes that show a down regulation of 2.0-fold or higher in daf-19(-) animals compared to the daf-19(+) control animals. Extracted from Additional data file 3.                                          |
| ce10a        | 167              | 15620651 | Colosimo <i>et al.</i> , 2004   | Genes differentially expressed between AFD and AWB. Extracted from Supplementary Table S1.                                                                                                              |

## Details of literature gene lists (continued)

### C. elegans

| Gene list ID | Probesets number | PMID     | Source                        | Description                                                                                                                         |
|--------------|------------------|----------|-------------------------------|-------------------------------------------------------------------------------------------------------------------------------------|
| ce10b        | 1513             | 15620651 | Colosimo <i>et al.</i> , 2004 | Genes differentially expressed between (AFD and AWB) and the unsorted whole embryonic cells. Extracted from Supplementary Table S2. |
| ce11a        | 1012             | 15780142 | Fox <i>et al.</i> , 2005      | unc-4::GFP enriched genes. Extracted from Additional data file 9.                                                                   |
| ce11b        | 1586             | 15780142 | Fox <i>et al.</i> , 2005      | N2 enriched genes. Extracted from Additional data file 10.                                                                          |

## Details of literature gene lists (continued)

| <b>Xenopus laevis</b> |                         |             |                              |                                                                                                                                                                                                                                                                                                |
|-----------------------|-------------------------|-------------|------------------------------|------------------------------------------------------------------------------------------------------------------------------------------------------------------------------------------------------------------------------------------------------------------------------------------------|
| <b>Gene list ID</b>   | <b>Probesets number</b> | <b>PMID</b> | <b>Source</b>                | <b>Description</b>                                                                                                                                                                                                                                                                             |
| xp1                   | 463                     | 16872594    | Urban <i>et al.</i> , 2006   | Genes regulated by hedgehog. Extracted from Supplementary material Part I.                                                                                                                                                                                                                     |
| xp2                   | 276                     | 16651540    | Sinner <i>et al.</i> , 2006  | Endoderm-enriched genes that were differentially expressed between vegetal and animal cap regions. Extracted from Supplementary Table S1.                                                                                                                                                      |
| xp3a                  | 188                     | 16756679    | Hufton <i>et al.</i> , 2006  | Genes regulated by ectopic organizer signaling. Extracted from Additional file S2.                                                                                                                                                                                                             |
| xp3b                  | 220                     | 16756679    | Hufton <i>et al.</i> , 2006  | Genes that show similar regulation in the full organizer conditions. Extracted from Additional file S3.                                                                                                                                                                                        |
| xp4a                  | 25                      | 17024524    | Malone <i>et al.</i> , 2006  | Top 25 male biased DEGs in both species. Extracted from Supplementary Table 4.                                                                                                                                                                                                                 |
| xp4b                  | 25                      | 17024524    | Malone <i>et al.</i> , 2006  | Top 25 female biased genes in both species. Extracted from Supplementary Table 4.                                                                                                                                                                                                              |
| xp4c                  | 25                      | 17024524    | Malone <i>et al.</i> , 2006  | Top 25 DEGs that show unbiased expression in both species. Extracted from Supplementary Table 4.                                                                                                                                                                                               |
| xp4d                  | 25                      | 17024524    | Malone <i>et al.</i> , 2006  | Top 25 male biased genes that had no difference in expression between species. Extracted from Supplementary Table 4.                                                                                                                                                                           |
| xp4e                  | 25                      | 17024524    | Malone <i>et al.</i> , 2006  | Top 25 female biased genes that had no difference in expression between species. Extracted from Supplementary Table 4.                                                                                                                                                                         |
| xp5a                  | 666                     | 15901671    | Gurvich <i>et al.</i> , 2005 | Genes most stimulated by both VPA and TSA in xenopus. Extracted from Supplementary data xenopus.stim key.                                                                                                                                                                                      |
| xp5b                  | 599                     | 15901671    | Gurvich <i>et al.</i> , 2005 | Genes most inhibited by both VPA and TSA in xenopus. Extracted from Supplementary data xenopus.inhib key.                                                                                                                                                                                      |
| xp6a                  | 1108                    | 16871633    | Grow <i>et al.</i> , 2006    | Comparison A: St53 1dPA Versus st57 1dPA. Genes differentially expressed between st53 blastemas and st57 pseudoblastemas at day 1 postamputation. Extracted from Supplementary Table using P (Welch's T-test) < 0.05.                                                                          |
| xp6b                  | 2428                    | 16871633    | Grow <i>et al.</i> , 2006    | Comparison B: St53 5dPA Versus st57 5dPA. Genes differentially expressed between st53 blastemas and st57 pseudoblastemas during regeneration of the limb (st53) or during spike formation (st57) at 5 days postamputation. Extracted from Supplementary Table using P (Welch's T-test) < 0.05. |
| xp6c                  | 1677                    | 16871633    | Grow <i>et al.</i> , 2006    | Comparison C: St53 1dPA Versus st53 5dPA. Genes differentially expressed from day 1 to day 5 during the regeneration of the st53 limb. Extracted from Supplementary Table using P (Welch's T-test) < 0.05.                                                                                     |
| xp6d                  | 115                     | 16871633    | Grow <i>et al.</i> , 2006    | Comparison D: St57 1dPA Versus st57 5dPA. Genes differentially expressed from day 1 to day 5 during st57 spike formation. Extracted from Supplementary Table using P (Welch's T-test) < 0.05.                                                                                                  |

## Details of literature gene lists (continued)

| <b>Zebrafish</b>    |                         |             |                                 |                                                                                                                                                         |
|---------------------|-------------------------|-------------|---------------------------------|---------------------------------------------------------------------------------------------------------------------------------------------------------|
| <b>Gene list ID</b> | <b>Probesets number</b> | <b>PMID</b> | <b>Source</b>                   | <b>Description</b>                                                                                                                                      |
| zf1                 | 295                     | 16631158    | Cheng <i>et al.</i> , 2006      | Liver-enriched genes. Extracted from Supplementary Table 1.                                                                                             |
| zf2                 | 662                     | 16869712    | Lien <i>et al.</i> , 2006       | Genes that were differentially expressed during heart regeneration process. Extracted from dataset S1.                                                  |
| zf3a                | 67                      | 16443690    | Andreassen <i>et al.</i> , 2006 | Transcripts enhanced at least 2-fold by TCDD exposure in comparison with their time matched vehicle control. Extracted from Table 2 in original paper.  |
| zf3b                | 132                     | 16443690    | Andreassen <i>et al.</i> , 2006 | Transcripts repressed at least 2-fold by TCDD exposure in comparison with their time matched vehicle control. Extracted from Table 3 in original paper. |
| zf4                 | 387                     | 15827125    | Weber <i>et al.</i> , 2005      | Genes differentially regulated between clo and WT siblings. Extracted from Supplementary Table S1.                                                      |
| zf5a                | 141                     | 16322560    | Chen <i>et al.</i> , 2005       | Transcript down-regulated between def mutant and WT. Extracted from Supplementary material Table 1.                                                     |
| zf5b                | 23                      | 16322560    | Chen <i>et al.</i> , 2005       | Transcript differentially up-regulated between def mutant and WT. Extracted from Supplementary material Table 2.                                        |
| zf6                 | 163                     | 16714409    | Carney <i>et al.</i> , 2006     | TCDD-induced genes in the zebrafish heart at 73, 74, 76 and 84 hpf. Extracted from Supplementary data S1.                                               |
| zf7a                | 78                      | 17251491    | Leung <i>et al.</i> , 2007      | Over-expressed genes in the RPE Compared with the Retina at 52 hpf. Extracted from Table 2 from the main paper.                                         |
| zf7b                | 988                     | 17251491    | Leung <i>et al.</i> , 2007      | Under-expressed genes in the RPE Compared with the Retina at 52 hpf. Extracted from Supplementary Table S3.                                             |
| zf8                 | 811                     | 16484454    | Giraldez <i>et al.</i> , 2006   | Genes that were up-regulated in MZdicer compared to wild type and MZdicer+miR-430 at 9 hpf. Extracted from Supplementary Table S1.                      |
| zf9                 | 220                     | 16638810    | Link <i>et al.</i> , 2006       | Differentially expressed genes between ectodermal and mesendodermal cells. Extracted from Supplementary Table S2.                                       |
| zf10a               | 600                     | 15901671    | Gurvich <i>et al.</i> , 2005    | Genes most stimulated by both VPA and TSA in zebrafish. Extracted from Supplementary data zebrafish.stim key.                                           |
| zf10b               | 617                     | 15901671    | Gurvich <i>et al.</i> , 2005    | Genes most inhibited by both VPA and TSA in zebrafish. Extracted from Supplementary data zebrafish.inhib key.                                           |
