# Supplementary material for: Text-based over-representation analysis of microarray gene lists with annotation bias
Source: PubMed Central journal article supplement — Nucleic Acids Res. 2009 May 8;37(11):e79. doi: 10.1093/nar/gkp310 (PMC2699530; doi:10.1093/nar/gkp310), 2009-05-08
Supplement: gkp310_3.pdf [file gkp310_3.pdf]

### Supplementary Data 3

To evaluate the performance of the approaches proposed in the manuscript, we performed a comparison of the over-represented GO terms versus PubMed tokens in the HG-U133A-based literature gene lists. Version 2.4.0 of the Bioconductor package GOSTats was used to identify GO terms (only the biological process category was considered here) that are significantly enriched in these gene lists. Over-represented tokens were identified with the outlier detection procedure (Outlier) and the extended hypergeometric test-based approach (ExtendedHG). In each case, the numbers of significant GO terms and tokens were recorded. For the token-based analysis, we chose to show results from the method (either Outlier or ExtendedHG) that produced the most significant tokens.

52 gene lists were analysed, of which:

- 5 do not have any hits
- 3 have at least one significant GO terms but not tokens
- 15 have at least one significant token but not GO terms

As shown in Figure 1, there is a good correlation between the number of significant GO terms and the number of significant tokens identified across the remaining 29 gene lists, which are associated with at least one significant GO term and token.

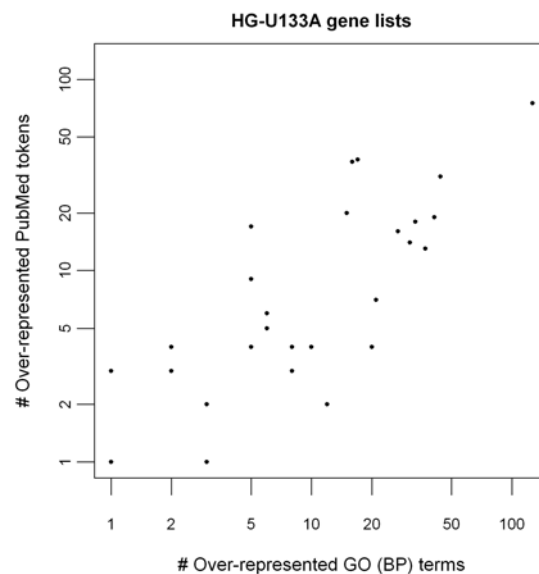

**Figure 1.** A comparison of the number of significant GO (BP) terms versus the number of significant abstract tokens in the 29 gene lists. The axes are on log scale.

To obtain a 'rough guide' for assessing the relevance of the over-represented GO terms and tokens, we read the publications from which these gene lists were derived and make a note of the biology that is deemed important by the authors. The results are shown in the following table.

| ID   | Source                                                                                                                                                                                             | Description/biology under studied                                                                                                                                                                                                                                                                                                                               | Over-represented GO (BP) terms                                                                                                                                                                                                                                                                                                                                                                                                                                                                                                     | Over-represented Tokens                                                                                                                                                                                                                                                                       | <sup>a</sup> Method |
|------|----------------------------------------------------------------------------------------------------------------------------------------------------------------------------------------------------|-----------------------------------------------------------------------------------------------------------------------------------------------------------------------------------------------------------------------------------------------------------------------------------------------------------------------------------------------------------------|------------------------------------------------------------------------------------------------------------------------------------------------------------------------------------------------------------------------------------------------------------------------------------------------------------------------------------------------------------------------------------------------------------------------------------------------------------------------------------------------------------------------------------|-----------------------------------------------------------------------------------------------------------------------------------------------------------------------------------------------------------------------------------------------------------------------------------------------|---------------------|
| hs1b | <p>PMID: 16531451</p> <p>Title: Global alterations in mRNA polysomal recruitment in a cell model of colorectal cancer progression to metastasis.</p> <p>Extracted from Supplementary Table II.</p> | <p>Probesets changed in the polysomal RNA sample.</p> <ul style="list-style-type: none"> <li>• Amine metabolism</li> <li>• Amino acid activation and translation</li> <li>• RNA transport and metabolism</li> <li>• cell proliferation</li> <li>• Apoptosis</li> <li>• tRNA aminoacylation pathway</li> </ul>                                                   | <p>Regulation of progression through cell cycle</p> <p>Regulation of cell cycle</p>                                                                                                                                                                                                                                                                                                                                                                                                                                                | <p>BREAST METASTATIC OVEREXPRESSION</p>                                                                                                                                                                                                                                                       | E                   |
| hs2a | <p>PMID: 15210650</p> <p>Title: Gene expression profiles during human CD4+ T cell differentiation.</p> <p>Extracted from Supplementary Table 1.</p>                                                | <p>Transcripts with greater than 3-fold enrichment in every T cell subpopulation compared to TSC.</p> <ul style="list-style-type: none"> <li>• T cell differentiation and function</li> <li>• Immune response</li> <li>• TCR signalling</li> <li>• Intrathymic differentiation</li> <li>• ERK1/ERK2 activity</li> <li>• Intrathymic T cell selection</li> </ul> | <p>Immune system process</p> <p>T cell activation</p> <p>Lymphocyte activation</p> <p>Leukocyte activation</p> <p>Positive regulation of antigen receptor-mediated signaling pathway</p> <p>Hemopoietic or lymphoid organ development</p> <p>Immune system development</p> <p>Cell activation</p> <p>Hemopoiesis</p> <p>Regulation of T cell activation</p> <p>Immune response</p> <p>T cell differentiation</p> <p>Lymphocyte differentiation</p> <p>Regulation of lymphocyte activation</p> <p>Regulation of cell activation</p> | <p>T-CELL</p> <p>LYMPHOID</p> <p>TCR</p> <p>THYMOCYTE</p> <p>CD3</p> <p>NK</p> <p>LINEAGE</p> <p>HEMATOPOIETIC</p> <p>IL-2</p> <p>LYMPHOCYTE</p> <p>JURKAT</p> <p>LYMPHOMA</p> <p>IMMUNE</p> <p>LCK</p> <p>T-LYMPHOCYTE</p> <p>CD2</p> <p>KILLER</p> <p>NAIVE</p> <p>CD45RA</p> <p>B-CELL</p> | E                   |
| hs2b | <p>PMID: 15210650</p> <p>Title: Gene expression profiles during human CD4+ T cell differentiation.</p> <p>Extracted from Supplementary Table 2.</p>                                                | <p>Transcripts whose expression changed by more than 3-fold during T cell differentiation.</p>                                                                                                                                                                                                                                                                  | <p>Cell cycle</p> <p>Cell cycle process</p> <p>Mitotic cell cycle</p> <p>M phase of mitotic cell cycle</p> <p>Cell cycle phase</p> <p>Mitosis</p> <p>Regulation of cell cycle</p> <p>DNA replication</p> <p>M phase</p> <p>Regulation of progression through cell cycle</p>                                                                                                                                                                                                                                                        | <p>LYMPHOID</p> <p>THYMOCYTE</p> <p>ANAPHASE</p> <p>CD8</p> <p>LYMPHOCYTE</p> <p>B-CELL</p> <p>LYMPHOMA</p> <p>T-CELL</p> <p>MITOSIS</p> <p>SPINDLE</p>                                                                                                                                       | E                   |

| ID   | Source                                                                                          | Description/biology under studied                                                                                                                                                                                         | Over-represented GO (BP) terms                                                                                                                                                                                                                                                                                                                                                                                                                                                                                                                                                                                                                                                                                                                                                                                                                                                                                                                                                                                                                       | Over-represented Tokens                                                                                                                                                                                                                       | Method |
|------|-------------------------------------------------------------------------------------------------|---------------------------------------------------------------------------------------------------------------------------------------------------------------------------------------------------------------------------|------------------------------------------------------------------------------------------------------------------------------------------------------------------------------------------------------------------------------------------------------------------------------------------------------------------------------------------------------------------------------------------------------------------------------------------------------------------------------------------------------------------------------------------------------------------------------------------------------------------------------------------------------------------------------------------------------------------------------------------------------------------------------------------------------------------------------------------------------------------------------------------------------------------------------------------------------------------------------------------------------------------------------------------------------|-----------------------------------------------------------------------------------------------------------------------------------------------------------------------------------------------------------------------------------------------|--------|
|      |                                                                                                 |                                                                                                                                                                                                                           | Immune response<br>Cell division<br>Spindle organization and biogenesis<br>Immune system process<br>Programmed cell death<br>Regulation of programmed cell death<br>Apoptosis<br>Regulation of apoptosis<br>Cell death<br>Death<br>DNA metabolic process<br>Cell cycle checkpoint<br>Microtubule-based process<br>Antigen processing and presentation<br>Regulation of mitosis<br>Positive regulation of apoptosis<br>Regulation of biological process<br>Positive regulation of programmed cell death<br>Cell development<br>Negative regulation of biological process<br>Biological regulation<br>Regulation of cellular process<br>Induction of apoptosis<br>Mitotic sister chromatid segregation<br>Negative regulation of cellular process<br>Induction of programmed cell death<br>Sister chromatid segregation<br>Spindle checkpoint<br>Negative regulation of programmed cell death<br>DNA-dependent DNA replication<br>Chromosome segregation<br>Negative regulation of apoptosis<br>Cell differentiation<br>Cellular developmental process | TCR<br>CHECKPOINT<br>CD3<br>CYTOKINESIS<br>THYMUS<br>CD4<br>NK<br>IL-2<br>KINETOCHORE<br>INTERLEUKIN-2<br>PROMETAPHASE<br>LEUKEMIA<br>INTERFERING<br>MITOTIC<br>INTERPHASE<br>KILLER<br>PROLIFERATING<br>LYMPH<br>MIDBODY<br>LINEAGE<br>VIRUS |        |
| hs2c | PMID: 15210650<br><br>Title: Gene expression profiles during human CD4+ T cell differentiation. | Transcripts enriched in both ITTP and DP by more than 3-fold.<br><br><ul style="list-style-type: none"> <li>• DNA replication, recombination and repair</li> <li>• Cell cycle regulation, progression, mitosis</li> </ul> | Mitotic cell cycle<br>Mitosis<br>M phase of mitotic cell cycle<br>Cell cycle phase<br>M phase                                                                                                                                                                                                                                                                                                                                                                                                                                                                                                                                                                                                                                                                                                                                                                                                                                                                                                                                                        | MITOTIC<br>ANAPHASE<br>SPINDLE<br>MITOSIS<br>KINETOCHORE                                                                                                                                                                                      | O      |

| ID   | Source                                                                                                                                         | Description/biology under studied                                                                                                                                                                                                                                                                                               | Over-represented GO (BP) terms                                                                                                                                                                                                                                                                                                                                                                                                                                                                                                                                                                                                                                                                                                                           | Over-represented Tokens                                                                                                                      | <sup>a</sup> Method |
|------|------------------------------------------------------------------------------------------------------------------------------------------------|---------------------------------------------------------------------------------------------------------------------------------------------------------------------------------------------------------------------------------------------------------------------------------------------------------------------------------|----------------------------------------------------------------------------------------------------------------------------------------------------------------------------------------------------------------------------------------------------------------------------------------------------------------------------------------------------------------------------------------------------------------------------------------------------------------------------------------------------------------------------------------------------------------------------------------------------------------------------------------------------------------------------------------------------------------------------------------------------------|----------------------------------------------------------------------------------------------------------------------------------------------|---------------------|
|      | Extracted from Supplementary Table 3-1.                                                                                                        | <ul style="list-style-type: none"> <li>• Lipid/glycolipid-presenting CD1 family</li> <li>• Transcriptional regulation</li> <li>• Regulation of apoptosis</li> </ul>                                                                                                                                                             | Cell cycle<br>Cell cycle process<br>Cell division<br>Spindle organization and biogenesis<br>Microtubule-based process<br>Microtubule cytoskeleton organization and biogenesis<br>Regulation of mitosis<br>Cytoskeleton organization and biogenesis<br>Regulation of progression through cell cycle<br>Regulation of cell cycle<br>Organelle organization and biogenesis<br>Phosphoinositide-mediated signaling<br>Second-messenger-mediated signaling<br>Chromosome segregation<br>DNA metabolic process<br>Spindle checkpoint<br>Microtubule-based movement<br>DNA replication<br>Mitotic sister chromatid segregation<br>Sister chromatid segregation<br>Cytoskeleton-dependent intracellular transport<br>Mitotic spindle organization and biogenesis | CHECKPOINT<br>CONGRESSION<br>CENP-A<br>AURORA<br>BUB1<br>CENP-H<br>MAD2<br>CENTROMERE<br>PROMETAPHASE<br>KINETOCHORE-<br>MICROTUBULE<br>MTOC |                     |
| hs2d | PMID: 15210650<br><br>Title: Gene expression profiles during human CD4+ T cell differentiation.<br><br>Extracted from Supplementary Table 3-2. | Transcripts enriched in more mature cells (SP4, CB4, and AB4) by more than 3-fold.<br><br><ul style="list-style-type: none"> <li>• Intracellular communication</li> <li>• Cell surface receptors</li> <li>• Peptide-presenting MHC antigens</li> <li>• Transcriptional regulation</li> <li>• Regulation of apoptosis</li> </ul> | Antigen processing and presentation of peptide antigen via MHC class I<br>Antigen processing and presentation of peptide antigen<br>Immune response<br>Antigen processing and presentation<br>Immune system process                                                                                                                                                                                                                                                                                                                                                                                                                                                                                                                                      | HLA-CLASS<br>HLA-A<br>OR-C<br>PERIPHERAL<br>CD8<br>HLA-C<br>HLA-B<br>HLA-G<br>IFN-GAMMA                                                      | O                   |
| hs2e | PMID: 15210650<br><br>Title: Gene expression profiles during human CD4+ T cell differentiation.<br><br>Extracted from Supplementary Table 3-3. | Transcripts enriched by more than 3-fold in ITTP compared to other lymphocytes.<br><br><ul style="list-style-type: none"> <li>• Immune function</li> </ul>                                                                                                                                                                      | Nitric oxide mediated signal transduction<br>CGMP biosynthetic process<br>CGMP metabolic process                                                                                                                                                                                                                                                                                                                                                                                                                                                                                                                                                                                                                                                         | INTERLEUKIN-2                                                                                                                                | O                   |
| hs2f | PMID: 15210650                                                                                                                                 | Transcripts enriched by more than 3-fold in                                                                                                                                                                                                                                                                                     | Lymphocyte activation                                                                                                                                                                                                                                                                                                                                                                                                                                                                                                                                                                                                                                                                                                                                    | LYMPHOPROLIFERATIO                                                                                                                           | O                   |

| ID   | Source                                                                                                                                                      | Description/biology under studied                                                                                                                                                                                                                                                         | Over-represented GO (BP) terms                                                                                                                                                                                                                                                                                                                                                                        | Over-represented Tokens                                 | <sup>a</sup> Method |
|------|-------------------------------------------------------------------------------------------------------------------------------------------------------------|-------------------------------------------------------------------------------------------------------------------------------------------------------------------------------------------------------------------------------------------------------------------------------------------|-------------------------------------------------------------------------------------------------------------------------------------------------------------------------------------------------------------------------------------------------------------------------------------------------------------------------------------------------------------------------------------------------------|---------------------------------------------------------|---------------------|
|      | Title: Gene expression profiles during human CD4+ T cell differentiation.<br><br>Extracted from Supplementary Table 3-4.                                    | DP compared to other lymphocytes.<br><br><ul style="list-style-type: none"> <li>• Thymocyte differentiation</li> <li>• Thymocyte survival and positive selection</li> <li>• Modulation of Th1 and Th2 response</li> <li>• CD1 family proteins</li> <li>• T cell co-stimulation</li> </ul> | Leukocyte activation<br>Cell activation<br>T cell activation<br>Antigen processing and presentation                                                                                                                                                                                                                                                                                                   | N<br>MYCOBACTERIAL<br>MYCOBACTERIA<br>INTERACTION       |                     |
| hs2i | PMID: 15210650<br><br>Title: Gene expression profiles during human CD4+ T cell differentiation.<br><br>Extracted from Supplementary Table 4-1.              | Transcripts showing SP4>CB4>AB4 pattern.<br><br><ul style="list-style-type: none"> <li>• Plasma membrane proteins</li> </ul>                                                                                                                                                              | -                                                                                                                                                                                                                                                                                                                                                                                                     | HMG-BOX<br>MMP-2                                        | O                   |
| hs3a | PMID: 15897907<br><br>Title: Identification of molecular apocrine breast tumours by microarray analysis.<br><br>Extracted from Supplementary Table Sheet 2. | Genes which best discriminate apocrine vs luminal (AL).                                                                                                                                                                                                                                   | Alcohol metabolic process<br>Monocarboxylic acid metabolic process<br>Carboxylic acid metabolic process<br>Organic acid metabolic process<br>Steroid biosynthetic process<br>Lipid metabolic process<br>Sterol biosynthetic process<br>Aldehyde metabolic process<br>Fatty acid metabolic process<br>Cholesterol biosynthetic process                                                                 | METABOLISM<br>ACETOXYMETHYL<br>ANTIANDROGEN<br>ANDROGEN | O                   |
| hs3b | PMID: 15897907<br><br>Title: Identification of molecular apocrine breast tumours by microarray analysis.<br><br>Extracted from Supplementary Table Sheet 2. | Genes which best discriminate apocrine vs basal (AB).                                                                                                                                                                                                                                     | Lipid metabolic process<br>Carboxylic acid metabolic process<br>Organic acid metabolic process<br>Monocarboxylic acid metabolic process<br>Alcohol metabolic process<br>Sterol biosynthetic process<br>Cellular lipid metabolic process<br>Lipid biosynthetic process<br>Steroid biosynthetic process<br>Fatty acid metabolic process<br>Cholesterol biosynthetic process<br>Sterol metabolic process | DESATURASE<br>FATTY                                     | O                   |
| hs4a | PMID: 16260967<br><br>Title: Effects of aerobic training on gene expression in skeletal muscle of elderly                                                   | Genes whose expression increased after training.<br><br><ul style="list-style-type: none"> <li>• Energy metabolism/mitochondrion</li> <li>• Lipid metabolism</li> </ul>                                                                                                                   | Acetyl-CoA metabolic process<br>Tricarboxylic acid cycle intermediate metabolic process<br>Tricarboxylic acid cycle<br>Acetyl-CoA catabolic process                                                                                                                                                                                                                                                   | MITOCHONDRIAL<br>MITOCHONDRIA<br>CATALYSIS<br>BURY      | O                   |

| ID   | Source                                                                                                                                                   | Description/biology under studied                                                                                                                                                                                                                                                                                                                                                                                                                                                                 | Over-represented GO (BP) terms                                                                                                                                                                                                                                                                                                                                                                                                                                                                                                                                                                                                                                                                                                                                                                                                                                                                                                                                                                                | Over-represented Tokens                                                                                                                                                                   | <sup>a</sup> Method |
|------|----------------------------------------------------------------------------------------------------------------------------------------------------------|---------------------------------------------------------------------------------------------------------------------------------------------------------------------------------------------------------------------------------------------------------------------------------------------------------------------------------------------------------------------------------------------------------------------------------------------------------------------------------------------------|---------------------------------------------------------------------------------------------------------------------------------------------------------------------------------------------------------------------------------------------------------------------------------------------------------------------------------------------------------------------------------------------------------------------------------------------------------------------------------------------------------------------------------------------------------------------------------------------------------------------------------------------------------------------------------------------------------------------------------------------------------------------------------------------------------------------------------------------------------------------------------------------------------------------------------------------------------------------------------------------------------------|-------------------------------------------------------------------------------------------------------------------------------------------------------------------------------------------|---------------------|
|      | men.<br>Extracted from Table S2 in the main paper.                                                                                                       | <ul style="list-style-type: none"> <li>• Proton pumps</li> <li>• Collagen</li> <li>• Protein, amino acid dephosphorylation</li> <li>• Heme biosynthesis</li> </ul>                                                                                                                                                                                                                                                                                                                                | Cofactor metabolic process<br>Coenzyme catabolic process<br>Cellular catabolic process<br>Cofactor catabolic process                                                                                                                                                                                                                                                                                                                                                                                                                                                                                                                                                                                                                                                                                                                                                                                                                                                                                          |                                                                                                                                                                                           |                     |
| hs4b | PMID: 16260967<br>Title: Effects of aerobic training on gene expression in skeletal muscle of elderly men.<br>Extracted from Table S3 in the main paper. | Genes whose expression decreased after training. <ul style="list-style-type: none"> <li>• Ribosome and protein catabolism</li> <li>• Muscle degradation</li> </ul>                                                                                                                                                                                                                                                                                                                                | Translation<br>Macromolecule biosynthetic process<br>Biosynthetic process<br>Cellular protein metabolic process<br>Cellular macromolecule metabolic process<br>Protein metabolic process                                                                                                                                                                                                                                                                                                                                                                                                                                                                                                                                                                                                                                                                                                                                                                                                                      | RIBOSOMAL<br>S14<br>R-PROTEIN<br>RRNA<br>U14                                                                                                                                              | O                   |
| hs5a | PMID: 12958056<br>Title: Gene expression profiling of bronchoalveolar lavage cells in acute lung rejection.<br>Extracted from Supplementary Table E1.    | Genes that are up-regulated in gene expression in acute rejection vs. no rejection (False Discovery Rate = 0.94%). <ul style="list-style-type: none"> <li>• Acute rejection response</li> <li>• Immune response</li> <li>• Inflammatory response</li> <li>• Transcriptional regulation</li> <li>• TGF-beta signalling</li> <li>• Apoptosis</li> <li>• Nucleotide GPCR receptors</li> <li>• Peptide GPCR receptors</li> <li>• Wnt signalling</li> <li>• Cytokine-CXC chemokine pathways</li> </ul> | Immune system process<br>Immune response<br>Leukocyte activation<br>Response to stimulus<br>Cell activation<br>Lymphocyte activation<br>Positive regulation of lymphocyte activation<br>Regulation of lymphocyte activation<br>Regulation of cell activation<br>Positive regulation of isotype switching to IgG isotypes<br>Lymphocyte mediated immunity<br>Cellular defense response<br>Leukocyte mediated immunity<br>Adaptive immune response<br>Adaptive immune response based on somatic recombination of immune receptors built from immunoglobulin superfamily domains<br>Regulation of immune system process<br>Regulation of immune response<br>Isotype switching to IgG isotypes<br>Regulation of isotype switching to IgG isotypes<br>Immunoglobulin mediated immune response<br>B cell mediated immunity<br>Positive regulation of B cell activation<br>Immune effector process<br>Positive regulation of isotype switching<br>Immune response-activating cell surface receptor signaling pathway | THYMOCYTE<br>CD8<br>NK<br>TCR<br>CD4<br>CD3<br>KILLER<br>IL-2<br>T-CELL<br>IMMUNE<br>LYMPHOCYTIC<br>LYMPHOCYTE<br>MAB<br>CYTOLYTIC<br>JURKAT<br>LYMPHOPROLIFERATIVE<br>LYMPHOMA<br>B-CELL | E                   |

| ID   | Source                                                                                                                                                | Description/biology under studied                                                                                                                                                                                                                                                                                                                                                                                                                                                                        | Over-represented GO (BP) terms                                                                                                                                                                                                                                                                                                                                                                                                                                                                                           | Over-represented Tokens                                                                                                                                                                                                                                                                                     | Method |
|------|-------------------------------------------------------------------------------------------------------------------------------------------------------|----------------------------------------------------------------------------------------------------------------------------------------------------------------------------------------------------------------------------------------------------------------------------------------------------------------------------------------------------------------------------------------------------------------------------------------------------------------------------------------------------------|--------------------------------------------------------------------------------------------------------------------------------------------------------------------------------------------------------------------------------------------------------------------------------------------------------------------------------------------------------------------------------------------------------------------------------------------------------------------------------------------------------------------------|-------------------------------------------------------------------------------------------------------------------------------------------------------------------------------------------------------------------------------------------------------------------------------------------------------------|--------|
|      |                                                                                                                                                       |                                                                                                                                                                                                                                                                                                                                                                                                                                                                                                          | Immune response-activating signal transduction<br>Immune response-regulating signal transduction<br>Immune response-regulating cell surface receptor signaling pathway<br>Antigen receptor-mediated signaling pathway<br>Positive regulation of mononuclear cell proliferation<br>Positive regulation of lymphocyte proliferation<br>Regulation of B cell activation<br>Signal transduction                                                                                                                              |                                                                                                                                                                                                                                                                                                             |        |
| hs5b | PMID: 12958056<br>Title: Gene expression profiling of bronchoalveolar lavage cells in acute lung rejection.<br>Extracted from Supplementary Table E2. | Genes with significant changes in gene expression in acute rejection vs. no rejection (False Discovery Rate = 4.63 %).<br><ul style="list-style-type: none"> <li>• Acute rejection response</li> <li>• Immune response</li> <li>• Inflammatory response</li> <li>• Transcriptional regulation</li> <li>• TGF-beta signalling</li> <li>• Apoptosis</li> <li>• Nucleotide GPCR receptors</li> <li>• Peptide GPCR receptors</li> <li>• Wnt signalling</li> <li>• Cytokine-CXC chemokine pathways</li> </ul> | Immune system process<br>Immune response<br>Response to stimulus<br>Leukocyte activation<br>Lymphocyte activation<br>Cell activation<br>Cell surface receptor linked signal transduction<br>T cell activation<br>Regulation of lymphocyte activation<br>Regulation of cell activation<br>Cellular defense response<br>Signal transduction<br>Positive regulation of lymphocyte activation<br>Cell communication<br>Regulation of T cell activation<br>Defense response<br>Regulation of multicellular organismal process | CD4<br>NK<br>IL-2<br>CD3<br>CD8<br>KILLER<br>THYMOCYTE<br>ENGAGEMENT<br>TCR<br>T-CELL<br>CYTOLYTIC<br>CD16<br>CD56<br>MAB<br>IMMUNE<br>LYMPHOCYTE<br>CD2<br>IL-12<br>IMMUNOGLOBULIN<br>PBL<br>INTERLEUKIN<br>ALLOGENEIC<br>LIGATION<br>CTL<br>GRANZYME<br>CYTOTOXICITY<br>RAFT<br>TH1<br>JURKAT<br>MONOCYTE | E      |

| ID   | Source                                                                                                                                          | Description/biology under studied                                                                                                                                                                                                                                                                                                                                                                                                        | Over-represented GO (BP) terms                                                                                                                                                                                                                                                                                                                                                                                                                                                                                                                                                                                                                        | Over-represented Tokens                                                                                    | <sup>a</sup> Method |
|------|-------------------------------------------------------------------------------------------------------------------------------------------------|------------------------------------------------------------------------------------------------------------------------------------------------------------------------------------------------------------------------------------------------------------------------------------------------------------------------------------------------------------------------------------------------------------------------------------------|-------------------------------------------------------------------------------------------------------------------------------------------------------------------------------------------------------------------------------------------------------------------------------------------------------------------------------------------------------------------------------------------------------------------------------------------------------------------------------------------------------------------------------------------------------------------------------------------------------------------------------------------------------|------------------------------------------------------------------------------------------------------------|---------------------|
|      |                                                                                                                                                 |                                                                                                                                                                                                                                                                                                                                                                                                                                          |                                                                                                                                                                                                                                                                                                                                                                                                                                                                                                                                                                                                                                                       | EFFECTOR<br>CYTOKINE<br>PHYTOHEMAGGLUTININ<br>ANTI-CD3<br>PERIPHERAL<br>MONONUCLEAR<br>CD45RO<br>IFN-GAMMA |                     |
| hs6a | PMID: 16319128<br>Title: Distinct expression profile in fumarate-hydratase-deficient uterine fibroids.<br>Extracted from Supplementary Table 1. | Down-regulated genes in FH mutant relative to FH wild-type fibroids.<br><ul style="list-style-type: none"><li>• Extracellular matrix</li><li>• Cell mobility</li><li>• Muscle contraction</li><li>• Organogenesis</li><li>• Muscle development</li><li>• Cell adhesion</li><li>• Plasma membrane</li></ul>                                                                                                                               | Anatomical structure development                                                                                                                                                                                                                                                                                                                                                                                                                                                                                                                                                                                                                      | MICROFIBRIL<br>TRANSFORMING<br>SMOOTH                                                                      |                     |
| hs6b | PMID: 16319128<br>Title: Distinct expression profile in fumarate-hydratase-deficient uterine fibroids.<br>Extracted from Supplementary Table 1. | Up-regulated genes in FH mutant relative to FH wild-type fibroids. Extracted from Supplementary Table 1.<br><ul style="list-style-type: none"><li>• Glycolysis</li><li>• Carbohydrate metabolism</li><li>• Hexose metabolism</li><li>• Iron ion homeostasis</li><li>• Oxidoreductase activity</li><li>• Membrane lipid catabolism</li><li>• Integral to endoplasmic reticulum membrane</li><li>• Electron transporter activity</li></ul> | Glucose catabolic process<br>Glycolysis<br>Hexose catabolic process<br>Monosaccharide catabolic process<br>Alcohol catabolic process<br>Glucose metabolic process<br>Cellular carbohydrate catabolic process<br>Hexose metabolic process<br>Monosaccharide metabolic process<br>Carbohydrate catabolic process<br>Cellular catabolic process<br>Cellular carbohydrate metabolic process<br>Carbohydrate metabolic process<br>Catabolic process<br>Cellular macromolecule catabolic process<br>Alcohol metabolic process<br>Phospholipid catabolic process<br>Macromolecule catabolic process<br>Cellular iron ion homeostasis<br>Iron ion homeostasis | GLYCOLYTIC<br>ALDO-KETO<br>PEROXIDATION<br>NICOTINAMIDE                                                    | O                   |
| hs6d | PMID: 16319128                                                                                                                                  | Up-regulated genes in FH mutant relative                                                                                                                                                                                                                                                                                                                                                                                                 | Glucose catabolic process                                                                                                                                                                                                                                                                                                                                                                                                                                                                                                                                                                                                                             | GLYCOLYTIC                                                                                                 | O                   |



| ID    | Source                                                                                                                                                       | Description/biology under studied                                                                                                                                                                                                                                                                                                                                                                                     | Over-represented GO (BP) terms                                                                                                                                                                                                                                                                                                                                                                                                                                                                                                                                                                                                                     | Over-represented Tokens                                                       | <sup>a</sup> Method |
|-------|--------------------------------------------------------------------------------------------------------------------------------------------------------------|-----------------------------------------------------------------------------------------------------------------------------------------------------------------------------------------------------------------------------------------------------------------------------------------------------------------------------------------------------------------------------------------------------------------------|----------------------------------------------------------------------------------------------------------------------------------------------------------------------------------------------------------------------------------------------------------------------------------------------------------------------------------------------------------------------------------------------------------------------------------------------------------------------------------------------------------------------------------------------------------------------------------------------------------------------------------------------------|-------------------------------------------------------------------------------|---------------------|
|       | Title: Distinct expression profile in fumarate-hydratase-deficient uterine fibroids.<br><br>Extracted from Supplementary Table 3.                            | to normal myometrium.<br><br><ul style="list-style-type: none"> <li>• Carbohydrate metabolism</li> <li>• Glycolysis</li> </ul>                                                                                                                                                                                                                                                                                        | Hexose catabolic process<br>Monosaccharide catabolic process<br>Alcohol catabolic process<br>Cellular carbohydrate catabolic process<br>Carbohydrate catabolic process<br>Glycolysis<br>Glucose metabolic process<br>Cellular carbohydrate metabolic process<br>Hexose metabolic process<br>Monosaccharide metabolic process<br>Carbohydrate metabolic process<br>Cellular catabolic process<br>Macromolecule catabolic process<br>Alcohol metabolic process<br>Catabolic process<br>Cellular macromolecule catabolic process<br>NADP metabolic process<br>Nicotinamide metabolic process<br>Cellular iron ion homeostasis<br>Iron ion homeostasis | NONSPHEROCYTIC<br>NADP<br>HEMOLYSIS<br>APOFERRITIN<br>RESOLUTION<br>ISOENZYME |                     |
| hs8   | PMID: 15971941<br><br>Title: Derivation of multipotent mesenchymal precursors from human embryonic stem cells.<br><br>Extracted from Supplementary Table S2. | Genes shared between primary and hESC-derived mesenchymal precursors but significantly different from undifferentiated hESCs.<br><br><ul style="list-style-type: none"> <li>• MSC markers including mesenchymal stem cell protein DSC54, hepatocyte growth factor, neuropilin 1, forkhead box D1, notch homolog.</li> </ul>                                                                                           | Organ development<br>Hemostasis<br>Cell cycle arrest<br>Blood coagulation<br>Coagulation<br>Wound healing<br>Response to wounding<br>Regulation of body fluids                                                                                                                                                                                                                                                                                                                                                                                                                                                                                     | COLLAGEN<br>ECM<br>STROMAL                                                    | ○                   |
| hs11a | PMID: 16049480<br><br>Title: Genes that mediate breast cancer metastasis to lung.<br><br>Extracted from Supplementary Table 2.                               | Genes differentially expressed between parental MDA-MB-231 and LM2 cell lines selected to be highly metastatic to lung.<br><br><ul style="list-style-type: none"> <li>• Lung metastatic activity</li> <li>• Growth and survival factors</li> <li>• Chemokines</li> <li>• Cell adhesion receptors</li> <li>• Extracellular proteases</li> <li>• Intracellular enzymes</li> <li>• Transcriptional regulators</li> </ul> | Antigen processing and presentation of peptide or polysaccharide antigen via MHC class II<br>Immune response<br>Immune system process                                                                                                                                                                                                                                                                                                                                                                                                                                                                                                              | METALLOPROTEINASE-2<br>SBT                                                    | ○                   |

| ID    | Source                                                                                                                                                   | Description/biology under studied                                                                                                                                                                                     | Over-represented GO (BP) terms                                                                                                                                                                                                                                                                                                                                                                                                                                                                                                                                                                                                                                                                                                                                                                                                                                                                                                | Over-represented Tokens                                                                                                                                      | <sup>a</sup> Method |
|-------|----------------------------------------------------------------------------------------------------------------------------------------------------------|-----------------------------------------------------------------------------------------------------------------------------------------------------------------------------------------------------------------------|-------------------------------------------------------------------------------------------------------------------------------------------------------------------------------------------------------------------------------------------------------------------------------------------------------------------------------------------------------------------------------------------------------------------------------------------------------------------------------------------------------------------------------------------------------------------------------------------------------------------------------------------------------------------------------------------------------------------------------------------------------------------------------------------------------------------------------------------------------------------------------------------------------------------------------|--------------------------------------------------------------------------------------------------------------------------------------------------------------|---------------------|
| hs11b | PMID: 16049480<br>Title: Genes that mediate breast cancer metastasis to lung.<br>Extracted from Supplementary Table 4.                                   | Lung metastasis candidate genes.<br><ul style="list-style-type: none"><li>Extracellular proteins (eg. SPARC, MMP2) act as virulence genes that may allow tumours to invade, colonise and grow in the lungs.</li></ul> | -                                                                                                                                                                                                                                                                                                                                                                                                                                                                                                                                                                                                                                                                                                                                                                                                                                                                                                                             | METALLOPROTEINASE-2                                                                                                                                          | O                   |
| hs12b | PMID: 16089502<br>Title: Functional analysis of human hematopoietic stem cell gene expression using zebrafish.<br>Extracted from Supplementary Table S2. | Probesets differentially expressed between adult bone marrow derived Rho-lo and Rho-hi cells.<br><ul style="list-style-type: none"><li>Cell cycle control</li></ul>                                                   | Cell cycle<br>Mitotic cell cycle<br>Cell cycle process<br>Cell cycle phase<br>DNA metabolic process<br>M phase of mitotic cell cycle<br>Mitosis<br>M phase<br>DNA replication<br>Cellular metabolic process<br>Cell division<br>Primary metabolic process<br>Metabolic process<br>Regulation of cell cycle<br>Macromolecule metabolic process<br>Regulation of progression through cell cycle<br>Chromosome organization and biogenesis<br>Translation<br>Chromosome organization and biogenesis (sensu Eukaryota)<br>Cell cycle checkpoint<br>Chromosome segregation<br>Response to DNA damage stimulus<br>DNA-dependent DNA replication<br>Response to endogenous stimulus<br>Nucleosome assembly<br>Mitotic sister chromatid segregation<br>Spindle organization and biogenesis<br>Interphase<br>Macromolecule biosynthetic process<br>Sister chromatid segregation<br>DNA repair<br>Organelle organization and biogenesis | ANAPHASE<br>CHECKPOINT<br>MITOSIS<br>MITOTIC<br>RIBOSOMAL<br>CYTOKINESIS<br>INTERPHASE<br>CYCLE<br>G1<br>KINETOCHORE<br>REPLICATION<br>CDK2<br>PROLIFERATING | E                   |

| ID    | Source                                                                                                                                                                                                                                 | Description/biology under studied                                                                                                                                                                                                                                                                                                                                                                                                  | Over-represented GO (BP) terms                                                                                                                                                                                    | Over-represented Tokens                                            | <sup>a</sup> Method |
|-------|----------------------------------------------------------------------------------------------------------------------------------------------------------------------------------------------------------------------------------------|------------------------------------------------------------------------------------------------------------------------------------------------------------------------------------------------------------------------------------------------------------------------------------------------------------------------------------------------------------------------------------------------------------------------------------|-------------------------------------------------------------------------------------------------------------------------------------------------------------------------------------------------------------------|--------------------------------------------------------------------|---------------------|
|       |                                                                                                                                                                                                                                        |                                                                                                                                                                                                                                                                                                                                                                                                                                    | Biopolymer metabolic process<br>Chromatin assembly<br>Biosynthetic process<br>Mitotic spindle organization and biogenesis<br>Nucleobase, nucleoside, nucleotide and nucleic acid metabolic process                |                                                                    |                     |
| hs12c | PMID: 16089502<br>Title: Functional analysis of human hematopoietic stem cell gene expression using zebrafish.<br>Extracted from Supplementary Table S3.                                                                               | Probesets differentially expressed between Rho-lo and Rho-hi cells from both umbilical cord blood and adult bone marrow.<br><ul style="list-style-type: none"><li>• Hematopoietic differentiation and development</li><li>• Cell cycle control</li><li>• Wnt signalling</li><li>• Germ cell development</li><li>• Globins</li></ul>                                                                                                | Oxygen transport<br>Gas transport<br>Antigen processing and presentation of peptide or polysaccharide antigen via MHC class II<br>DNA replication<br>Antigen processing and presentation<br>DNA metabolic process | THAL<br>BETA-CHAIN<br>DELTA-GLOBIN<br>HBA2<br>THALASSEMIA<br>ANODE | O                   |
| hs15a | PMID: 12756304<br>Title: A global view of the selectivity of zinc deprivation and excess on genes expressed in human THP-1 mononuclear cells.<br>Extracted from Supplementary Table 3.                                                 | Group 1 zinc responsive genes.<br><ul style="list-style-type: none"><li>• Nucleic acid binding</li><li>• Apoptosis</li><li>• Metabolism</li><li>• Cell growth and development</li><li>• Signal transduction</li><li>• Immune, cytokine</li><li>• Cytoskeleton</li></ul>                                                                                                                                                            | RNA metabolic process<br>Transcription from RNA polymerase II promoter                                                                                                                                            | SCLEROTOME<br>CD4<br>RNAP<br>EFFECTOR                              |                     |
| hs17b | PMID: 16804116<br>Title: Gene-expression profiling of Waldenstrom macroglobulinemia reveals a phenotype more similar to chronic lymphocytic leukemia than multiple myeloma.<br>Extracted from Supplementary Table S1: MM Unique Genes. | Genes that displayed distinct expression profile in MM compared to CLL and WM.<br><ul style="list-style-type: none"><li>• Signal transduction and intracellular signalling</li><li>• Cell-surface receptor-linked signalling e.g. AKT, IGF-1R and Wnt signalling</li><li>• Prostacyclin synthesis</li><li>• angiopoietin signalling</li><li>• Integrin-mediated cell adhesion</li><li>• Early B-cell receptor signalling</li></ul> | Regulation of biological process<br>Regulation of cellular process<br>Biological regulation                                                                                                                       | MB-1                                                               | O                   |
| hs17c | PMID: 16804116<br>Title: Gene-expression profiling of Waldenstrom macroglobulinemia reveals a phenotype more similar to chronic lymphocytic leukemia than multiple myeloma.                                                            | Genes that displayed distinct expression profile in CLL compared to WM and MM.<br><ul style="list-style-type: none"><li>• Apoptosis regulation</li><li>• Immune response</li><li>• Cell cycle regulation</li></ul>                                                                                                                                                                                                                 | -                                                                                                                                                                                                                 | APC                                                                | O                   |

| ID    | Source                                                                                                                                                                                                                                                      | Description/biology under studied                                                                                                                   | Over-represented GO (BP) terms                                                                                                                                                                                                                                                                                                                                                                                                                                                                                                                                                           | Over-represented Tokens                                                                                                                                                                                                                                                                                                                                                                                                                                                          | Method |
|-------|-------------------------------------------------------------------------------------------------------------------------------------------------------------------------------------------------------------------------------------------------------------|-----------------------------------------------------------------------------------------------------------------------------------------------------|------------------------------------------------------------------------------------------------------------------------------------------------------------------------------------------------------------------------------------------------------------------------------------------------------------------------------------------------------------------------------------------------------------------------------------------------------------------------------------------------------------------------------------------------------------------------------------------|----------------------------------------------------------------------------------------------------------------------------------------------------------------------------------------------------------------------------------------------------------------------------------------------------------------------------------------------------------------------------------------------------------------------------------------------------------------------------------|--------|
|       | Extracted from Supplementary Table S1: CLL Unique Genes.                                                                                                                                                                                                    |                                                                                                                                                     |                                                                                                                                                                                                                                                                                                                                                                                                                                                                                                                                                                                          |                                                                                                                                                                                                                                                                                                                                                                                                                                                                                  |        |
| hs17d | <p>PMID: 16804116</p> <p>Title: Gene-expression profiling of Waldenstrom macroglobulinemia reveals a phenotype more similar to chronic lymphocytic leukemia than multiple myeloma.</p> <p>Extracted from Supplementary Table S1: WM CLL B-cell cluster.</p> | <p>A cluster of genes that were over-expressed in B-cell, WM and CLL.</p> <ul style="list-style-type: none"> <li>• Cell cycle regulation</li> </ul> | <p>Immune system process<br/> Immune response<br/> Cell communication<br/> Signal transduction<br/> Lymphocyte activation<br/> Leukocyte activation<br/> Cell activation<br/> B cell activation<br/> Defense response<br/> Immune response-activating cell surface receptor signaling pathway<br/> Immune response-activating signal transduction<br/> Immune response-regulating signal transduction<br/> Immune response-regulating cell surface receptor signaling pathway<br/> Antigen receptor-mediated signaling pathway<br/> Immune system development<br/> T cell activation</p> | <p>LYMPHOID<br/> B-CELL<br/> HEMATOPOIETIC<br/> LYMPHOCYTE<br/> CD19<br/> ENGAGEMENT<br/> LINEAGE<br/> PRE-B<br/> CD8<br/> TCR<br/> LYMPHOMA<br/> NAIVE<br/> BCR<br/> CD4<br/> THYMOCYTE<br/> SRC<br/> IMMUNE<br/> MONOCYTE<br/> PRO-B<br/> BURKITT<br/> IL-4<br/> CD21<br/> GERMINAL<br/> TONSILLAR<br/> CD23<br/> LYMPHOCYTIC<br/> IMMUNOGLOBULIN<br/> CD45<br/> CD3<br/> B-LYMPHOCYTE<br/> EXTRANODAL<br/> HISTOCOMPATIBILITY<br/> F-ACTIN<br/> JURKAT<br/> ZAP70<br/> NK</p> | E      |

| ID    | Source                                                                                                                                               | Description/biology under studied                                                                                                                                                                                                                                                                                                                                                                                                                                                                                                                                          | Over-represented GO (BP) terms                                                                                                                                                                                                                                                                                                                                                                                                                                                                                                            | Over-represented Tokens                                                                                                                                                                                      | <sup>a</sup> Method |
|-------|------------------------------------------------------------------------------------------------------------------------------------------------------|----------------------------------------------------------------------------------------------------------------------------------------------------------------------------------------------------------------------------------------------------------------------------------------------------------------------------------------------------------------------------------------------------------------------------------------------------------------------------------------------------------------------------------------------------------------------------|-------------------------------------------------------------------------------------------------------------------------------------------------------------------------------------------------------------------------------------------------------------------------------------------------------------------------------------------------------------------------------------------------------------------------------------------------------------------------------------------------------------------------------------------|--------------------------------------------------------------------------------------------------------------------------------------------------------------------------------------------------------------|---------------------|
| hs18a | PMID: 16836768<br>Title: Signatures of human regulatory T cells: an encounter with old friends and new players.<br>Extracted from Additional file 1. | Up-regulated genes comparing CD4+CD25+ T cells versus CD4+CD25- T cells.<br><br>All differentially expressed genes can be classified into:<br>• Cytokines/chemokines and their receptors<br>• Cell cycle and proliferation<br>• Apoptosis<br>• Signal transduction<br>• Transcriptional regulation<br><br>The authors identified 3 signalling modules using Pathway Analysis software:<br>• Genes that control T cell receptor signalling, activation and proliferation<br>• Genes that control differentiation and maintenance<br>• Genes that control survival/apoptosis | Antigen processing and presentation of peptide or polysaccharide antigen via MHC class II<br>Antigen processing and presentation<br>Immune response<br>Response to stimulus<br>Immune system process                                                                                                                                                                                                                                                                                                                                      | KILLER<br><br>DPB1<br>DRB1<br>DRB<br>DR2<br>HLA-DPB1<br>DPA1<br>DQB1*0602<br>HLA-DRB1<br>DQW1<br>DQB1*0302<br>AND-DQ<br>PCR-SSOP<br>HLA-DR<br>HLA-D<br>DQA1<br>OLIGOTYPING<br>SBT                            | O                   |
| hs18c | PMID: 16836768<br>Title: Signatures of human regulatory T cells: an encounter with old friends and new players.<br>Extracted from Additional file 4. | Genes differentially expressed in Foxp3 over-expressing CD4+ Th cell lines cells relative to the GFP transduced CD4+ Th controls.<br><br>• TNF receptor superfamily<br>• Activation of signal transduction pathways eg. NFkB, JNK, P38, ERK and PI3K<br>• Immune response                                                                                                                                                                                                                                                                                                  | Immune system process<br>Immune response<br>Response to stimulus<br>Signal transduction<br>Cell communication<br>Lymphocyte activation<br>Leukocyte activation<br>T cell activation<br>Cell death<br>Death<br>Biological regulation<br>Apoptosis<br>Programmed cell death<br>Cell activation<br>Defense response<br>Cell development<br>Regulation of cellular process<br>Regulation of biological process<br>Positive regulation of biological process<br>Regulation of lymphocyte activation<br>Positive regulation of cellular process | LYMPHOID<br>T-CELL<br>CD4<br>CD3<br>CD8<br>IL-2<br>CD25<br>ANTI-CD3<br>NAIVE<br>LYMPHOCYTE<br>TCR<br>HELPER<br>CD28<br>ENGAGEMENT<br>IMMUNODEFICIENCY<br>FOXP3<br>TH1<br>JURKAT<br>INFECT<br>NK<br>THYMOCYTE | E                   |

| ID | Source | Description/biology under studied | Over-represented GO (BP) terms                                                                                                                                                                                                                                                                                                                                                                                                                                                                                                                                                                                                                                                                                                                                                                                                                                                                                                                                                                                                                                                                                                                                                                                                                                                                                                                                                                                                                        | Over-represented Tokens                                                                                                                                                                                                                                                                                                                                                                                                                                                       | Method |
|----|--------|-----------------------------------|-------------------------------------------------------------------------------------------------------------------------------------------------------------------------------------------------------------------------------------------------------------------------------------------------------------------------------------------------------------------------------------------------------------------------------------------------------------------------------------------------------------------------------------------------------------------------------------------------------------------------------------------------------------------------------------------------------------------------------------------------------------------------------------------------------------------------------------------------------------------------------------------------------------------------------------------------------------------------------------------------------------------------------------------------------------------------------------------------------------------------------------------------------------------------------------------------------------------------------------------------------------------------------------------------------------------------------------------------------------------------------------------------------------------------------------------------------|-------------------------------------------------------------------------------------------------------------------------------------------------------------------------------------------------------------------------------------------------------------------------------------------------------------------------------------------------------------------------------------------------------------------------------------------------------------------------------|--------|
|    |        |                                   | Regulation of cell activation<br>Cell differentiation<br>Cellular developmental process<br>Cell surface receptor linked signal transduction<br>Regulation of apoptosis<br>Regulation of programmed cell death<br>Negative regulation of biological process<br>Negative regulation of cellular process<br>Positive regulation of lymphocyte activation<br>Elevation of cytosolic calcium ion concentration<br>Cytosolic calcium ion homeostasis<br>Cytokine biosynthetic process<br>Cytokine metabolic process<br>Developmental process<br>Regulation of cytokine biosynthetic process<br>Cell proliferation<br>Regulation of T cell activation<br>Cellular di-, tri-valent inorganic cation homeostasis<br>Di-, tri-valent inorganic cation homeostasis<br>Cellular cation homeostasis<br>Cation homeostasis<br>Cellular calcium ion homeostasis<br>Calcium ion homeostasis<br>Inflammatory response<br>Response to external stimulus<br>Cellular ion homeostasis<br>Cellular chemical homeostasis<br>Somatic recombination of immunoglobulin genes during immune response<br>Somatic diversification of immunoglobulins during immune response<br>Immunoglobulin production during immune response<br>Somatic diversification of immune receptors via germline recombination within a single locus<br>Somatic cell DNA recombination<br>Somatic recombination of immunoglobulin gene segments<br>Isotype switching<br>Cellular metal ion homeostasis | IMMUNE<br>PBMC<br>REJECTION<br>B-CELL<br>IL-10<br>LYMPHOCYTIC<br>UNINFECT<br>KILLER<br>COSTIMULATORY<br>IMMUNITY<br>MONOCYTE<br>LYMPHOMA<br>HIV-1<br>T-LYMPHOCYTE<br>IL-4<br>INTERLEUKIN-2<br>CYTOMETRY<br>INTERLEUKIN<br>HIV<br>ALLOGENEIC<br>CYTOKINE<br>CD45RO<br>INFECTION<br>VIRAL<br>PHA<br>CTLA-4<br>PHYTOHEMAGGLUTININ<br>GRAFT-VERSUS-HOST<br>IFN-GAMMA<br>HLA-DR<br>PROLIFERATE<br>MAB<br>IL-6<br>MONONUCLEAR<br>LIGATION<br>CD56<br>TREG<br>AB<br>INTERFERON-GAMMA |        |

| ID | Source | Description/biology under studied | Over-represented GO (BP) terms                                                                                                                                                                                                                                                                                                                                                                                                                                                                                                                                                                                                                                                                                                                                                                                                                                                                                                                                                                                                                                                                                                                                                                                                                                                                                                                                                                                                                                                                                                                                                                                                                                                              | Over-represented Tokens                                                                                                                                                                                                                                                                                   | Method |
|----|--------|-----------------------------------|---------------------------------------------------------------------------------------------------------------------------------------------------------------------------------------------------------------------------------------------------------------------------------------------------------------------------------------------------------------------------------------------------------------------------------------------------------------------------------------------------------------------------------------------------------------------------------------------------------------------------------------------------------------------------------------------------------------------------------------------------------------------------------------------------------------------------------------------------------------------------------------------------------------------------------------------------------------------------------------------------------------------------------------------------------------------------------------------------------------------------------------------------------------------------------------------------------------------------------------------------------------------------------------------------------------------------------------------------------------------------------------------------------------------------------------------------------------------------------------------------------------------------------------------------------------------------------------------------------------------------------------------------------------------------------------------|-----------------------------------------------------------------------------------------------------------------------------------------------------------------------------------------------------------------------------------------------------------------------------------------------------------|--------|
|    |        |                                   | <ul style="list-style-type: none"> <li>Metal ion homeostasis</li> <li>Chemical homeostasis</li> <li>Response to wounding</li> <li>Positive regulation of protein biosynthetic process</li> <li>Regulation of isotype switching</li> <li>Immune system development</li> <li>Ion homeostasis</li> <li>Somatic diversification of immune receptors</li> <li>Somatic diversification of immunoglobulins</li> <li>Production of molecular mediator of immune response</li> <li>Leukocyte differentiation</li> <li>Positive regulation of protein metabolic process</li> <li>Mononuclear cell proliferation</li> <li>Lymphocyte proliferation</li> <li>Cytokine production</li> <li>Positive regulation of cellular biosynthetic process</li> <li>Positive regulation of T cell activation</li> <li>Anti-apoptosis</li> <li>Positive regulation of isotype switching</li> <li>Immunoglobulin production</li> <li>Antigen processing and presentation of peptide or polysaccharide antigen via MHC class II</li> <li>Lymphocyte mediated immunity</li> <li>Regulation of cell proliferation</li> <li>T cell differentiation</li> <li>Negative regulation of apoptosis</li> <li>Cellular defense response</li> <li>Negative regulation of programmed cell death</li> <li>Chemotaxis</li> <li>Taxis</li> <li>Leukocyte mediated immunity</li> <li>Homeostatic process</li> <li>Lymphocyte differentiation</li> <li>Positive regulation of biosynthetic process</li> <li>Adaptive immune response</li> <li>Adaptive immune response based on somatic recombination of immune receptors built from immunoglobulin superfamily domains</li> <li>Regulation of mononuclear cell proliferation</li> </ul> | <ul style="list-style-type: none"> <li>GVHD</li> <li>INFILTRATION</li> <li>ANTI</li> <li>STIMULATION</li> <li>COSTIMULATION</li> <li>IL-7</li> <li>INFECTIOUS</li> <li>PMA</li> <li>IL-13</li> <li>CYTOTOXIC</li> <li>THYMIC</li> <li>CD69</li> <li>IL-12</li> <li>IMMUNOLOGICAL</li> <li>TNFR</li> </ul> |        |

| ID    | Source                                                                                       | Description/biology under studied                                                  | Over-represented GO (BP) terms                                                                                                                                                                                                                                                                                                                                                                                                                                                                                                                                                                                                                                                                                                                                                                                                                                                                                                                                                                                                                                                                                                                                                                                                                                                                    | Over-represented Tokens                   | Method |
|-------|----------------------------------------------------------------------------------------------|------------------------------------------------------------------------------------|---------------------------------------------------------------------------------------------------------------------------------------------------------------------------------------------------------------------------------------------------------------------------------------------------------------------------------------------------------------------------------------------------------------------------------------------------------------------------------------------------------------------------------------------------------------------------------------------------------------------------------------------------------------------------------------------------------------------------------------------------------------------------------------------------------------------------------------------------------------------------------------------------------------------------------------------------------------------------------------------------------------------------------------------------------------------------------------------------------------------------------------------------------------------------------------------------------------------------------------------------------------------------------------------------|-------------------------------------------|--------|
|       |                                                                                              |                                                                                    | Regulation of lymphocyte proliferation<br>Regulation of multicellular organismal process<br>Positive regulation of cytokine biosynthetic process<br>Cytokine and chemokine mediated signaling pathway<br>Locomotory behavior<br>Cellular homeostasis<br>Regulation of T cell proliferation<br>Regulation of biological quality<br>Behavior<br>Hemopoietic or lymphoid organ development<br>Immune effector process<br>Positive regulation of apoptosis<br>Response to chemical stimulus<br>Positive regulation of cell proliferation<br>Positive regulation of programmed cell death<br>Positive regulation of cellular metabolic process<br>Regulation of translation<br>Induction of apoptosis<br>Induction of programmed cell death<br>B cell proliferation<br>Regulation of interleukin-2 biosynthetic process<br>Immunoglobulin mediated immune response<br>B cell mediated immunity<br>T cell proliferation<br>Response to stress<br>Positive regulation of metabolic process<br>Regulation of protein metabolic process<br>Regulation of B cell activation<br>Cleavage of lamin<br>Cleavage of cytoskeletal proteins during apoptosis<br>Hemopoiesis<br>Regulation of cellular biosynthetic process<br>B cell activation<br>Interleukin-2 production<br>Interleukin-2 biosynthetic process |                                           |        |
| hs19b | PMID: 15869706<br>Title: Clinical and biological characteristics of cervical neoplasias with | Down-regulated genes in FGFR3 mutated tumours relative to FGFR3 wild type tumours. | Immune response<br>Immune system process<br>Response to stimulus<br>Defense response                                                                                                                                                                                                                                                                                                                                                                                                                                                                                                                                                                                                                                                                                                                                                                                                                                                                                                                                                                                                                                                                                                                                                                                                              | IFN-GAMMA<br>MONOCYTE<br>IMMUNE<br>KILLER | E      |



| ID | Source                                                                           | Description/biology under studied                                            | Over-represented GO (BP) terms                                                                                                                                                                                                                                                                                                                                                                                                                                                                                                                                                                                                                                                                                                                                                                                                                                                                                                                                                                                                                                                                                                                                                                                                                                                | Over-represented Tokens                                                                                                                                                      | Method |
|----|----------------------------------------------------------------------------------|------------------------------------------------------------------------------|-------------------------------------------------------------------------------------------------------------------------------------------------------------------------------------------------------------------------------------------------------------------------------------------------------------------------------------------------------------------------------------------------------------------------------------------------------------------------------------------------------------------------------------------------------------------------------------------------------------------------------------------------------------------------------------------------------------------------------------------------------------------------------------------------------------------------------------------------------------------------------------------------------------------------------------------------------------------------------------------------------------------------------------------------------------------------------------------------------------------------------------------------------------------------------------------------------------------------------------------------------------------------------|------------------------------------------------------------------------------------------------------------------------------------------------------------------------------|--------|
|    | FGFR3 mutation.<br>Extracted from Additional file 2: Negative Significant Genes. | <ul style="list-style-type: none"> <li>Transcriptional regulation</li> </ul> | Response to wounding<br>Antigen processing and presentation<br>Inflammatory response<br>Response to external stimulus<br>Antigen processing and presentation of peptide or polysaccharide antigen via MHC class II<br>Activation of immune response<br>Positive regulation of immune system process<br>Positive regulation of immune response<br>Innate immune response<br>Cell adhesion<br>Biological adhesion<br>Regulation of immune system process<br>Regulation of immune response<br>Positive regulation of multicellular organismal process<br>Immune effector process<br>Humoral immune response<br>Chemotaxis<br>Taxis<br>Leukocyte mediated immunity<br>Adaptive immune response<br>Adaptive immune response based on somatic recombination of immune receptors built from immunoglobulin superfamily domains<br>Activation of plasma proteins during acute inflammatory response<br>Complement activation<br>Leukocyte activation<br>Locomotory behavior<br>Regulation of multicellular organismal process<br>Cell activation<br>Lymphocyte mediated immunity<br>Behavior<br>Cell motility<br>Localization of cell<br>Prostaglandin biosynthetic process<br>Prostanoid biosynthetic process<br>Immunoglobulin mediated immune response<br>B cell mediated immunity | HISTOCOMPATIBILITY<br>CD8<br>INFLAMMATORY<br>CD3<br>NK<br>MHC<br>INFLAMMATION<br>CHEMOTACTIC<br>RHEUMATOID<br>DECIDUAL<br>CYTOKINE<br>IMMUNITY<br>HLA-DR<br>TNF-ALPHA<br>CD4 |        |

| ID   | Source                                                                                                                                                    | Description/biology under studied                                                         | Over-represented GO (BP) terms                                                                                                                                                                                                                                                                                                                                                                                                                                                                                                                                                                                                                                                                                                                                                                                                                                                                                                                                                            | Over-represented Tokens                                                                                                                                                 | <sup>a</sup> Method |
|------|-----------------------------------------------------------------------------------------------------------------------------------------------------------|-------------------------------------------------------------------------------------------|-------------------------------------------------------------------------------------------------------------------------------------------------------------------------------------------------------------------------------------------------------------------------------------------------------------------------------------------------------------------------------------------------------------------------------------------------------------------------------------------------------------------------------------------------------------------------------------------------------------------------------------------------------------------------------------------------------------------------------------------------------------------------------------------------------------------------------------------------------------------------------------------------------------------------------------------------------------------------------------------|-------------------------------------------------------------------------------------------------------------------------------------------------------------------------|---------------------|
|      |                                                                                                                                                           |                                                                                           | Acute inflammatory response<br>Response to stress                                                                                                                                                                                                                                                                                                                                                                                                                                                                                                                                                                                                                                                                                                                                                                                                                                                                                                                                         |                                                                                                                                                                         |                     |
| hs20 | PMID: 15604246<br>Title: Androgen-induced differentiation and tumorigenicity of human prostate epithelial cells.<br>Extracted from Supplementary Table 1. | Genes differentially expressed between LHSR and LHS.<br><br>• Androgen receptor signaling | Mitotic cell cycle<br>Cell cycle phase<br>Cell cycle process<br>Cell cycle<br>M phase<br>M phase of mitotic cell cycle<br>Mitosis<br>Cell division<br>Regulation of progression through cell cycle<br>Regulation of cell cycle<br>Chromosome segregation<br>DNA replication<br>Regulation of mitosis<br>Mitotic sister chromatid segregation<br>Regulation of cellular process<br>Sister chromatid segregation<br>Cell cycle checkpoint<br>Spindle organization and biogenesis<br>Regulation of biological process<br>Microtubule-based process<br>Biopolymer metabolic process<br>Organelle organization and biogenesis<br>Cell proliferation<br>Interphase of mitotic cell cycle<br>DNA metabolic process<br>Microtubule cytoskeleton organization and biogenesis<br>Cellular component organization and biogenesis<br>Interphase<br>Mitotic cell cycle checkpoint<br>Cytoskeleton organization and biogenesis<br>Nucleobase, nucleoside, nucleotide and nucleic acid metabolic process | MITOTIC<br>CHECKPOINT<br>SPINDLE<br>ANAPHASE<br>MITOSIS<br>ARREST<br>MICROARRAY<br>CYCLE<br>PROMETAPHASE<br>G2<br>CHROMATID<br>KINETOCHORE<br>CYTOKINESIS<br>INTERPHASE | E                   |

<sup>a</sup>Method: Text-based ORA method (O = Outlier detection analysis; E = Extended hypergeometric test) that produced the results shown in 'Over-represented Tokens'.
